# Supplementary material
Source: PubMed Central journal article supplement (PMC5837104)
Supplement: 41437_2017_2_MOESM1_ESM.pdf [file 41437_2017_2_MOESM1_ESM.pdf]

**Supplementary Material** of “Porcine Y-chromosome variation is consistent with the occurrence of paternal gene flow from non-Asian to Asian populations”

**Authors:** Sara Guirao-Rico, Oscar Ramirez, Ana Ojeda, Marcel Amills & Sebastian E. Ramos-Onsins

**Index:**

**Supplementary figure legends.....pages 2-4**  
**Supplementary figures.....pages 5-17**  
**Supplementary tables.....pages 18-32**

## Supplementary Figures

**Figure S1.** Distributions and confidence intervals (CI) for the Y chromosome variability to divergence ratio obtained by bootstrap analysis. (A) Distributions of the ratios considering i) all wild boars together, Asian wild boars and Non-Asian wild boars (from left to right). Red vertical lines are indicating the percentiles 2.5 and 97.5 of the distribution and vertical blue line is indicating the mean of the ratio (B) On top, distributions of the ratios for the Non-Asian (left) and Asian wild boars (right). Distribution of the difference of the Non-Asian from the Asian ratios (bottom).

### Figure S2.

A Matrix representing the sequence variation of samples of each group. On the top, the name of each locus where the variants are located and the position number in the concatenated fragment of 9903 bp. Bold values indicate that the position is already genotyped. On the right and with different colours, the code number for the sequenced samples in each group. Gray lines inside the matrix mean missing data.

**Figure S3.** The effect of different evolutionary processes on the Y/A ratio. (A) Subdivision process. (C) Population decline process. (B, D) The same Subdivision and Population decline processes as in A and C but adding an arbitrary reduction of 22x in the levels of variability at Y-chromosome, mimicking the effect of selective linkage event. The time of split is indicated in the x-axis, while the effective population size of the second population is indicated in the y-axis. The orange arrow indicates the range of values of the observed Y/A ratio. The black arrow indicates the expected range of values under the SNM with an equal females vs males ratio.

**Figure S4.** Validation of the ABC analysis: (A) Cross-validation analysis using pseudo-observed data (PODs). In black, the percentage of cases where the true model was correctly identified. (B) Comparison of the empirical and posterior probabilities obtained from PODs assuming the model IM as the true model.

**Figure S5.** Posterior predictive simulations for the model IM. The figure shows where each observed summary statistic (red vertical line) fall within the distribution of summary statistics obtained from simulated data (black curve). Their respective probabilities are indicated on the

top.

**Figure S6.** Posterior quantile distributions of model parameters. Simulations of 1,000 PODs were used. The Kolmogorov-Smirnov test for uniformity probabilities are indicated above each parameter.

**Figure S7.** Heat Map of the expected estimates of variability and linkage disequilibrium as a function of Time of migration ( $T_{mig}$ ) and the ratio of Recombination versus  $\theta$ . Coalescent simulations were performed considering an arbitrary sample of  $n=20$  divided into two populations (Asian and non-Asian) of 10 individuals each and a single locus of 1000 sites for both, Y chromosome and an Autosome. The population mutation parameter was set to  $\theta=0.05$  per site. The chrom-Y linked locus does not suffer of recombination, while the Autosomal locus has a population recombination parameter  $R=4N_e r$ , where  $r$  is the recombination rate per generation. The demographic history was modeled considering that the current size of the second population (Asian) is five times that of the first population (non-Asian). The simulated historical events (see also Figure 2, model IM), described from present to past, were: 1) A migration event ( $M=4N_e m$ , where  $m$  is the migration rate per generation) from first (non-Asian) to second (Asian) population that started at time  $T_{mig}$  and lasted for  $0.01 \times 4N_e$  generations. 2) An isolation period until the two populations merge in an ancestral population of the same size as the first population at  $2.5 \times 4N_e$  generations after present. We consider that only males migrate from non-Asian to Asian population, therefore the value of migration parameter for Autosomal loci was set to half the value of the migration parameter for Y-linked loci. The ranges of Migration, Time of migration and Recombination values were drawn from a log 10-uniform distribution ranging from: i) 10 to 1000 for Migration ( $M$ ), except for figure S2 A, where  $M$  was set to zero; ii) 0.005 to  $0.5 \times 4N_e$  generations for Time of migration ( $T_{mig}$ ); iii) from 0.01 to 0.25 for Recombination ( $R$ ). One million iterations were performed in all cases.

For each section/panel of Figure S2 (A-F): On the left, the ratio of estimates of chrom-Y versus autosomal locus only for Asian populations. On the right, the ratio of estimated of non-Asian versus Asian Autosomal locus. On the top, population mutation parameter estimates ( $\theta_Y/\theta_{Aut}$  and  $\theta_{noA}/\theta_A$ ). On the bottom, linkage disequilibrium estimates ( $Zns_Y/Zns_{Aut}$  and  $Zns_{noA}/Zns_A$ ). (A) Migration values from population one (non-Asian) to population 2 (Asian) equal to zero. (B-F) Migration values from population one (non-Asian) to population

2 (Asian) drawn from a log10-uniform distribution. In all cases, the time of migration was  $0.01 \times 4N_e$  generations. The values of the distribution were ranging logarithmically, from: (B)  $M=10$  to  $M=25.1$ . (C)  $M=25.1$  to  $M=63.1$ . (D)  $M=63.1$  to  $M=158.5$  during. (E)  $M=158.5$  to  $M=398.1$ . (F)  $M=398.1$  to  $M=1000$ .

**Figure S8.** Geographical distribution of the Non-Asian and Asian haplogroups of the Asian Local Pigs (ALP) and Asian Wild boars (AWB). Pie symbols are proportional to the pig sample size.

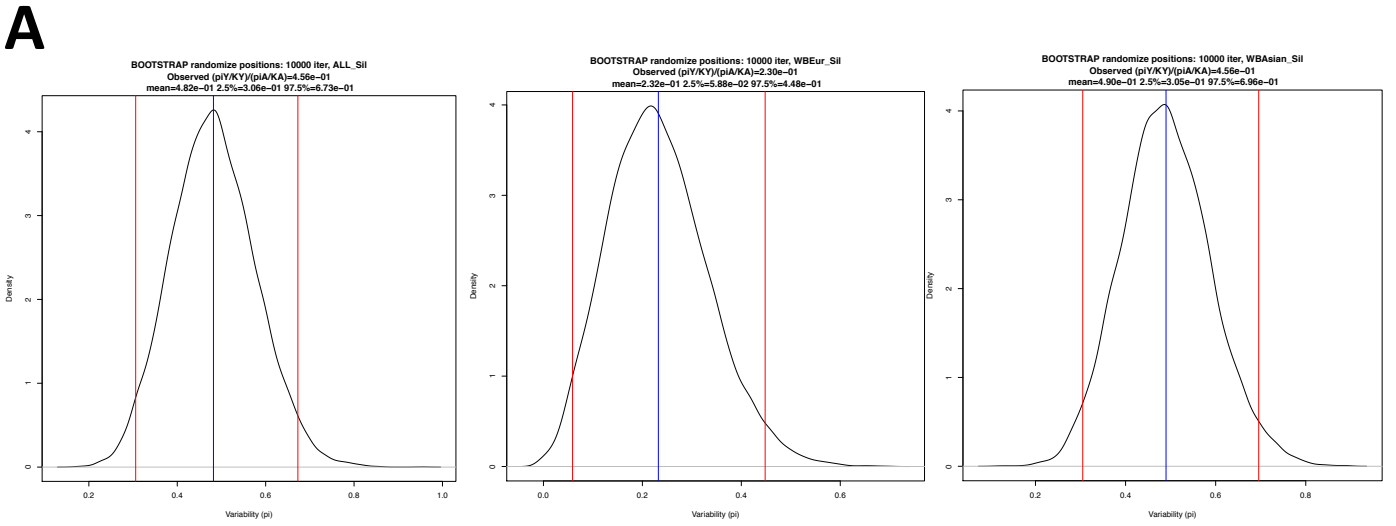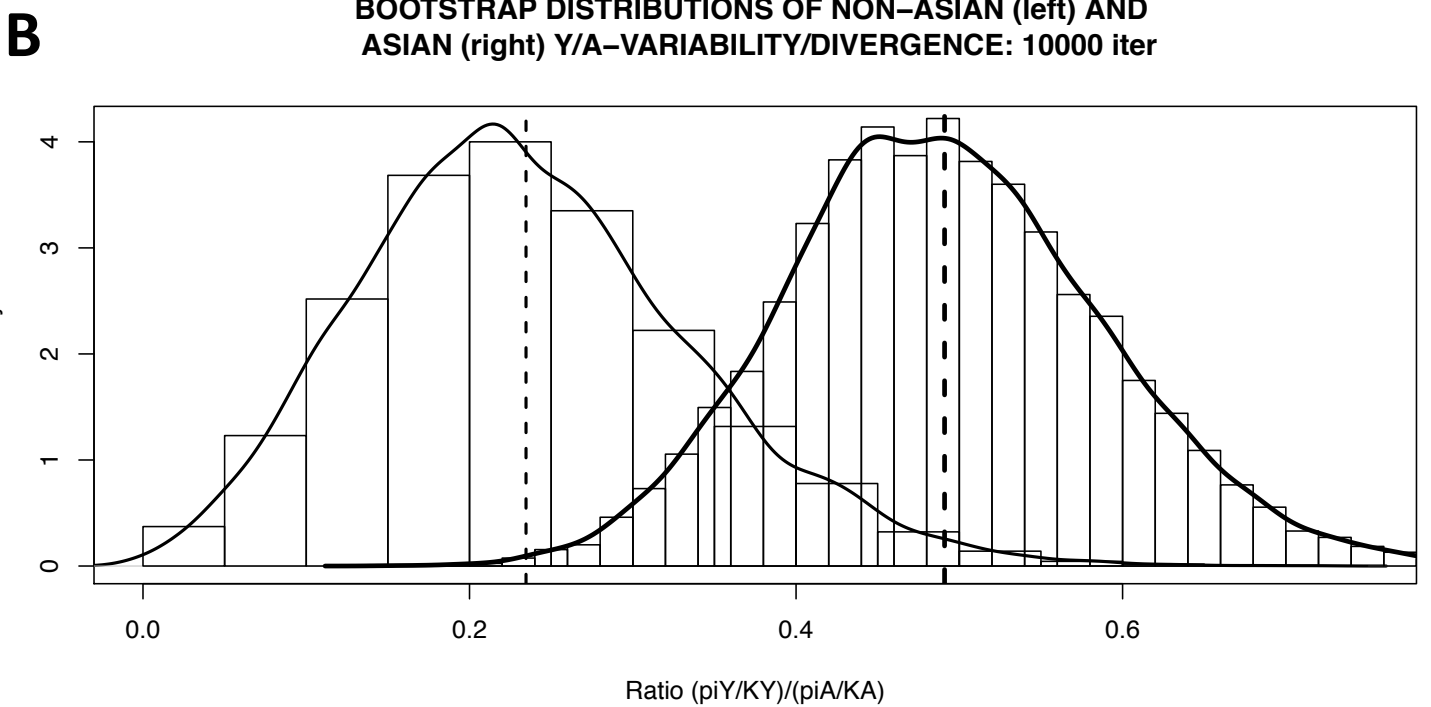

**TESTING DIFFERENCE (piY/kY)/(piA/kA) BETWEEN NON-ASIAN AND ASIAN: 10000 iter**  
 Observed=-2.26e-01  
 mean=-2.56e-01 2.5%=-5.23e-01 97.5%=2.22e-02 p-value= 3.51e-02

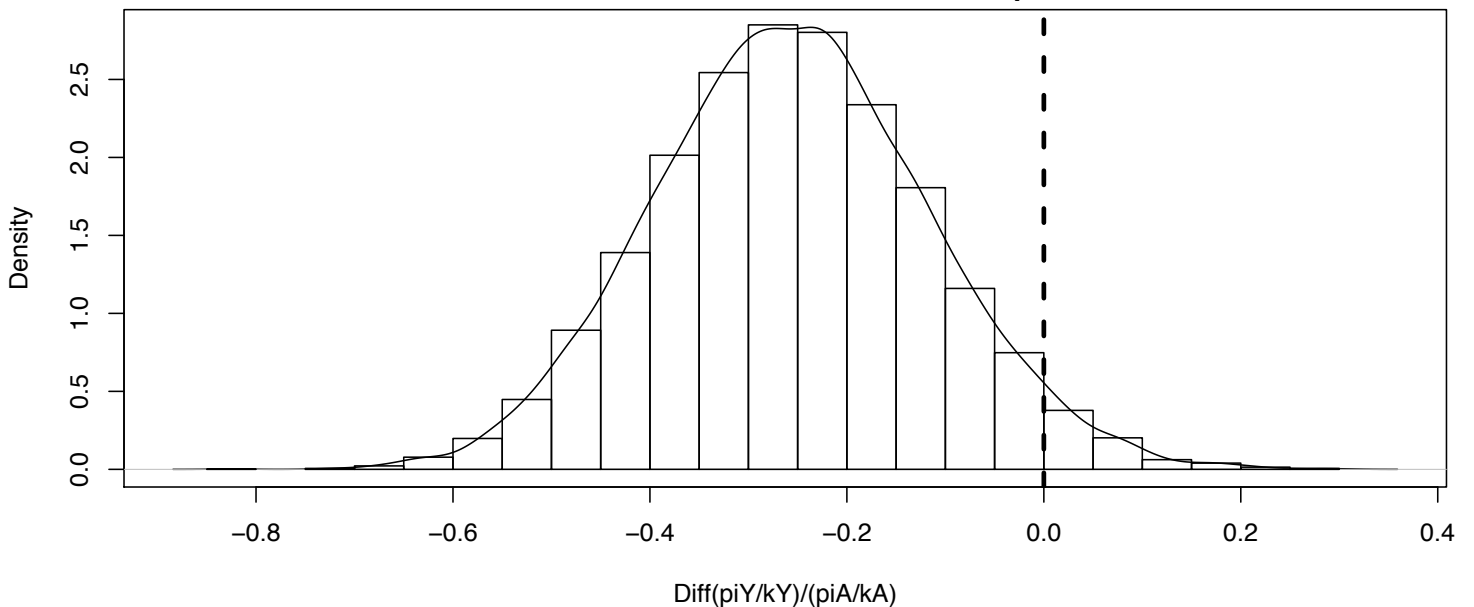

|           |       | SRY                                                                                                                                                                     | AMELY                                                                                                                                                                                           | USP9Y                                                                                                                                                                                                                         | DBY                                                                                                                                                                                             | DDX3Y                                                                                                                                                                                           | UTY                                                                                                                                                                                             |                                                                                                                                                                                                                                                                                                                                                       |                                                                                                                             |
|-----------|-------|-------------------------------------------------------------------------------------------------------------------------------------------------------------------------|-------------------------------------------------------------------------------------------------------------------------------------------------------------------------------------------------|-------------------------------------------------------------------------------------------------------------------------------------------------------------------------------------------------------------------------------|-------------------------------------------------------------------------------------------------------------------------------------------------------------------------------------------------|-------------------------------------------------------------------------------------------------------------------------------------------------------------------------------------------------|-------------------------------------------------------------------------------------------------------------------------------------------------------------------------------------------------|-------------------------------------------------------------------------------------------------------------------------------------------------------------------------------------------------------------------------------------------------------------------------------------------------------------------------------------------------------|-----------------------------------------------------------------------------------------------------------------------------|
|           |       | 527 SRYpro2_3_1<br>644<br>672<br>1119 SRYpro4<br>1493 SRYpro5<br>1652<br>2409<br>2754 SRYpro6<br>3331<br>4250 SRY_1<br>4367<br>4675 SRY_3<br>4719<br>4861 SRY_5<br>4918 | 5186 AmelY_ProF#1<br>5220 AmelY_ProF#2<br>5858 AmelY_i2F2_1<br>6041 AmelY_i2F2_2                                                                                                                | 6368                                                                                                                                                                                                                          | 6744 DBYin1_A#1<br>6789 DBYin1_A#2<br>7169<br>7227 DBYin1_B_2                                                                                                                                   | 7574<br>7575 DBYin5_1#2<br>7772 DBYin5_2<br>7892 DBYin5_3                                                                                                                                       | 8059 UTYin1_1<br>8152 UTYin1_2<br>8205 UTYin1_3<br>8397 UTYin7#2<br>8399 UTYin7#2b<br>8581<br>9573                                                                                              |                                                                                                                                                                                                                                                                                                                                                       |                                                                                                                             |
| EUROPE    | EWB   | WBES0103<br>WBBE0256                                                                                                                                                    | G T A T C G T C A C C G G G A<br>A . . . . .                                                                                                                                                    | G C T G<br>A . . . . .                                                                                                                                                                                                        | T<br>. . . . .                                                                                                                                                                                  | A G G C<br>. . . . .                                                                                                                                                                            | C G C G<br>. . . . .                                                                                                                                                                            | G T C T T T C<br>. . . . .                                                                                                                                                                                                                                                                                                                            |                                                                                                                             |
|           | MEDLP | IBES0106<br>IBES0475<br>IBES0541<br>PNES0155<br>IBES0002<br>IBES0247<br>IBES0073                                                                                        | . . . . .<br>. . . . .                                                                                                         | A . . . . .<br>A . . . . .<br>A . . . . .                                                                                                                                                                                     | . . . . .<br>. . . . .<br>. . . . .                                                                                                                                                             | . . . . .<br>. . . . .<br>. . . . .                                                                                                                                                             | . . . . .<br>. . . . .<br>. . . . .                                                                                                                                                             | . . . . . C G . . .<br>. . . . . C G . . .<br>. . . . . C G . . .<br>. . . . . C G . . .<br>. . . . . C G . . .<br>. . . . . C G . . .<br>. . . . . C G . . .                                                                                                                                                                                         |                                                                                                                             |
|           | ANGLP | TWGB0371<br>TWGB0372                                                                                                                                                    | . . . . . C C A .<br>. C . G T A . T C . . C C A .                                                                                                                                              | . . . . .<br>. . . . .                                                                                                                                                                                                        | C<br>C                                                                                                                                                                                          | G A C A<br>G A C A                                                                                                                                                                              | T A T A<br>T A T A                                                                                                                                                                              | C C G . . . . G<br>C C G . . . . G                                                                                                                                                                                                                                                                                                                    |                                                                                                                             |
|           | INTP  | LWES0284<br>LWES0477<br>LWGB0345<br>PIES0459<br>PIGB0478<br>LDES0423<br>LWES0509<br>PTES0501<br>PTES0505<br>PTES0506<br>DUES0188<br>DUGB0353<br>LRES0400<br>LRGB0338    | . . . . .<br>. . . . . | A . . . . .<br>A . . . . . | . . . . .<br>. . . . . | . . . . .<br>. . . . . | . . . . .<br>. . . . . | . . . . . C G . . .<br>. . . . . C G . . .<br>. . . . . C G . . .<br>. . . . . C G . . .<br>. . . . . C G . . .<br>. . . . . C G . . .<br>. . . . . C G . . .<br>. . . . . C G . . .<br>. . . . . C G . . .<br>. . . . . C G . . .<br>. . . . . C G . . .<br>. . . . . C G . . .<br>. . . . . C G . . .<br>. . . . . C G . . .<br>. . . . . C G . . . |                                                                                                                             |
|           |       | AFWB                                                                                                                                                                    | WBTN0226<br>WBTN0228<br>WBTN0229<br>WBTN0230<br>WBTN0231                                                                                                                                        | . . . . .<br>. . . . .<br>. . . . .<br>. . . . .<br>. . . . .                                                                                                                                                                 | A . . . . .<br>A . . . . .                                                                                                                         | . . . . .<br>. . . . .<br>. . . . .<br>. . . . .<br>. . . . .                                                                                                                                   | . . . . . C . . .<br>. . . . .<br>. . . . .<br>. . . . .<br>. . . . .                                                                                                                           | . . . . . C G . . .<br>. . . . . C G . . .<br>. . . . . C G . . .<br>. . . . . C G . . .<br>. . . . . C G . . .                                                                                                                                                                                                                                       |                                                                                                                             |
|           |       | AFP                                                                                                                                                                     | NABE0024<br>NABE0025<br>NAKE0131<br>MUZW0725<br>MUZW0175                                                                                                                                        | . . . . .<br>. . . . .<br>. . . . . C C A .<br>. . . . . T . C . . .<br>. . . . . G . . . . .                                                                                                                                 | . . . . .<br>. . . . .<br>. . . . . T . . . . .<br>. . . . . C A . . . . .<br>. . . . . T . . . . .                                                                                             | . . . . .<br>. . . . .<br>. . . . . C . . . . .<br>. . . . . C . . . . .<br>. . . . . C . . . . .                                                                                               | . . . . .<br>. . . . .<br>. . . . . G A C A<br>. . . . . G A C A                                                                                                                                | . . . . .<br>. . . . .<br>. . . . . T A T A<br>. . . . . T A T A                                                                                                                                                                                                                                                                                      | . . . . . C G . . .<br>. . . . . C G . . .<br>. . . . . C C G . . . G<br>. . . . . C C G . . . G<br>. . . . . C C G . . . G |
| NEAR EAST |       | WBIR0189<br>WBTQ0122<br>WBTQ0119<br>WBAM0001<br>WBAM0002                                                                                                                | . . . . .<br>. . . . .<br>. . . . .<br>. . . T . . . . .<br>. . . T . . . . .                                                                                                                   | A . . . . .<br>A . . . . .                                                                                                                                                       | . . . . .<br>. . . . .<br>. . . . .<br>. . . . .<br>. . . . .                                                                                                                                   | . . . . .<br>. . . . .<br>. . . . .<br>. . . . .<br>. . . . .                                                                                                                                   | . . . . .<br>. . . . .<br>. . . . .<br>. . . . .<br>. . . . .                                                                                                                                   |                                                                                                                                                                                                                                                                                                                                                       |                                                                                                                             |
| AMERICA   |       | SCAP                                                                                                                                                                    | HLMX0146<br>HLMX0950                                                                                                                                                                            | . . . . .<br>. . . . .                                                                                                                                                                                                        | . . . . .<br>. . . . .                                                                                                                                                                          | . . . . .<br>. . . . .                                                                                                                                                                          | . . . . .<br>. . . . .                                                                                                                                                                          | . . . . .<br>. . . . .                                                                                                                                                                                                                                                                                                                                |                                                                                                                             |
| ASIA      |       | AWB                                                                                                                                                                     | WBCN0695<br>WBJP0491<br>WBKR0446                                                                                                                                                                | . C . G T . . T C . . . . .<br>A . . . . . A . . . . . C . G<br>. . . . . C . . . . .                                                                                                                                         | . . . . .<br>. . . . . T C A . . . . .<br>. . . . .                                                                                                                                             | C<br>C<br>C                                                                                                                                                                                     | G A C A<br>. . . . . C . . . . .<br>G A C A                                                                                                                                                     | T A T A<br>T A T A<br>T A T A                                                                                                                                                                                                                                                                                                                         | C C G . . . . G<br>. . . . .<br>C C G . . . . G                                                                             |
|           |       | ALP                                                                                                                                                                     | MSUS0621<br>MICN0681<br>MSCN0405<br>MSES0283<br>MSUS0620<br>VTES0307                                                                                                                            | . C . G T . . T C G . . . C . . .<br>. . . . . G . . . . . C . . . . .<br>. . . . . G . . . . . C . . . . .<br>. . . . . G . . . . . C . . . . .<br>. . . . . G . . . . . C . . . . .<br>. . . . . G . . . . . C . . . . .    | . . . . . T C A . . . . .<br>. . . . .<br>. . . . . T C A . . . . .<br>. . . . . T C A . . . . .<br>. . . . . T C A . . . . .<br>. . . . . A . . . . .                                          | C<br>C<br>C<br>C<br>C<br>C                                                                                                                                                                      | G A C A<br>. . . . .<br>G A C A<br>G A C A<br>G A C A<br>G A C A                                                                                                                                | T A T A<br>. . . . .<br>T A T A<br>T A T A<br>T A T A<br>T A T A                                                                                                                                                                                                                                                                                      | C C G . . . . G<br>. . . . . C G . . . . .<br>. . . . .<br>C C G . . . . G<br>C C G . . . . G<br>C C G . . . . G            |
|           |       | OUTG                                                                                                                                                                    | BBES0280<br>BAGB0335                                                                                                                                                                            | . C . G . . . T . . . . C . . .<br>. . . . . C . . . . .                                                                                                                                                                      | . T . . . . .<br>. T . . . . .                                                                                                                                                                  | . . . . .<br>C                                                                                                                                                                                  | G . C A<br>G . C A                                                                                                                                                                              | . . . T .<br>. . . T .                                                                                                                                                                                                                                                                                                                                | . C . . . . .<br>. C . . . . .                                                                                              |

**A**

### Subdivision (2 pops, one constant in size. Split at time $T$ )

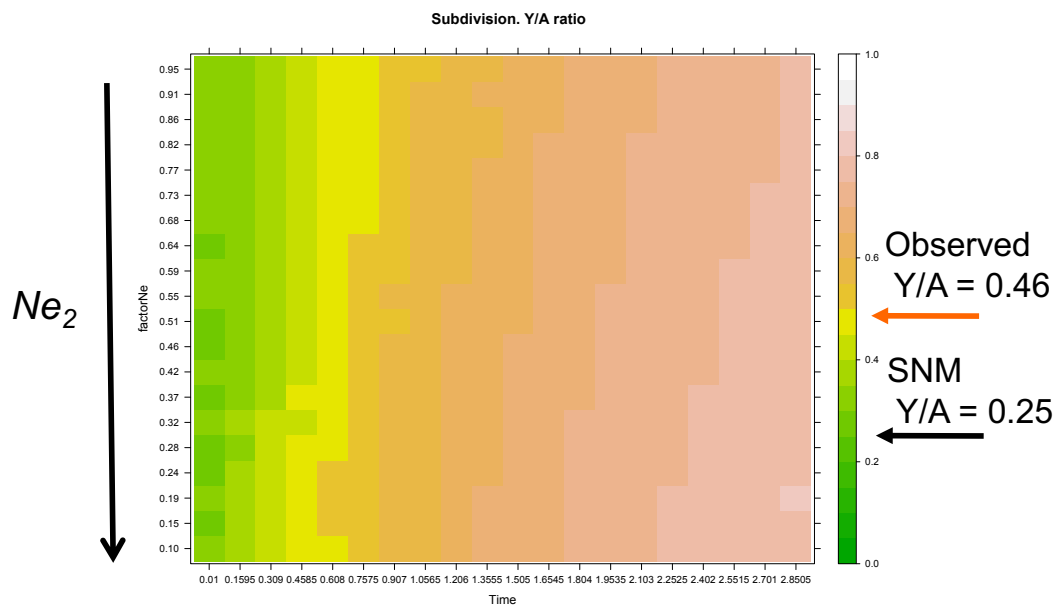**C**

### Population Decline ( $Ne$ of the Ancestral pop. Split at time $T$ )

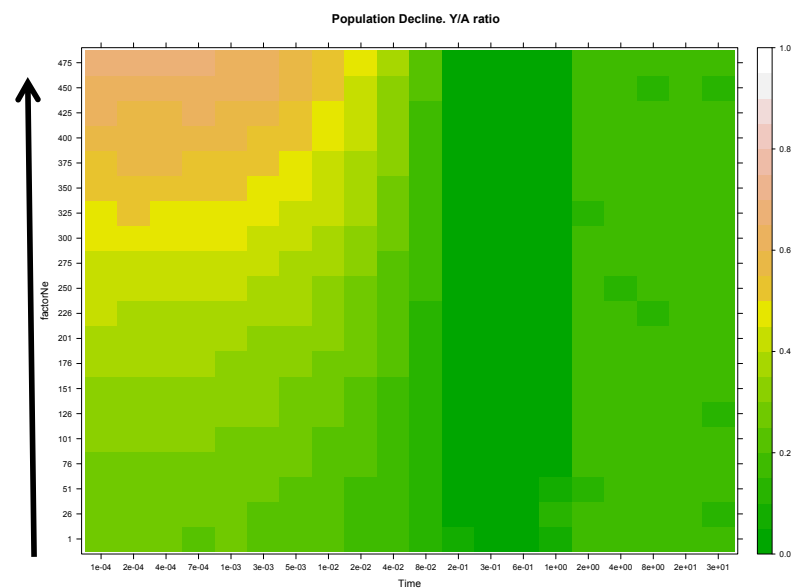**B**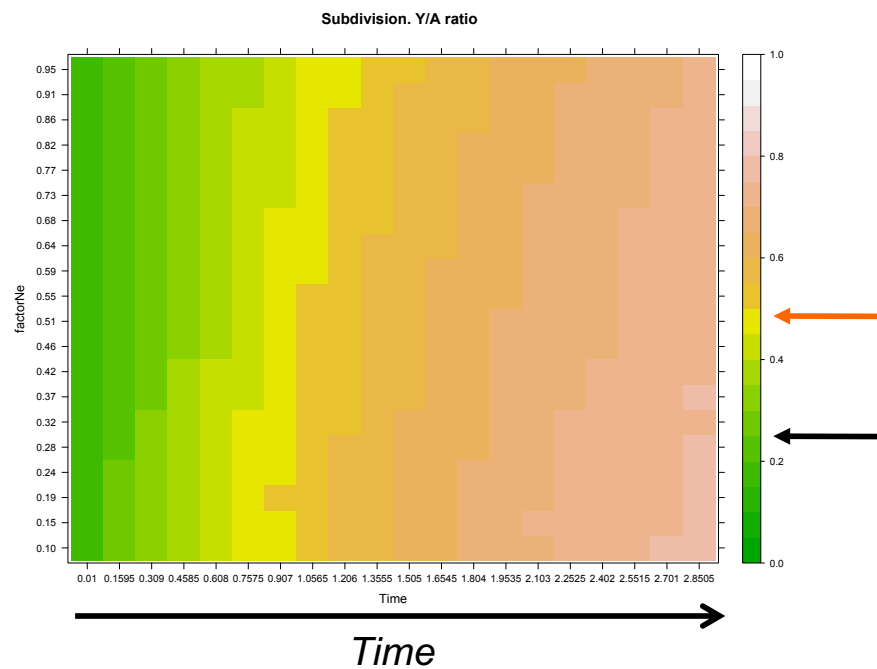**D**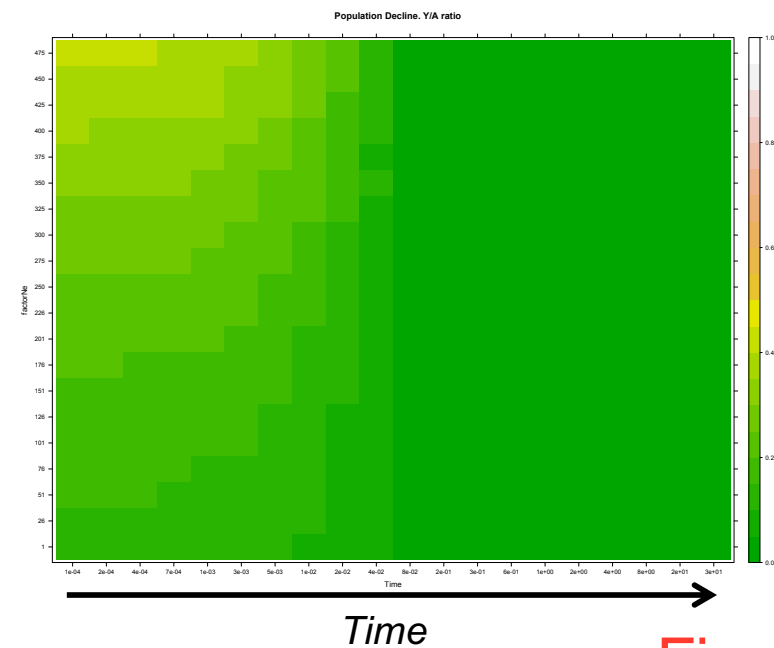

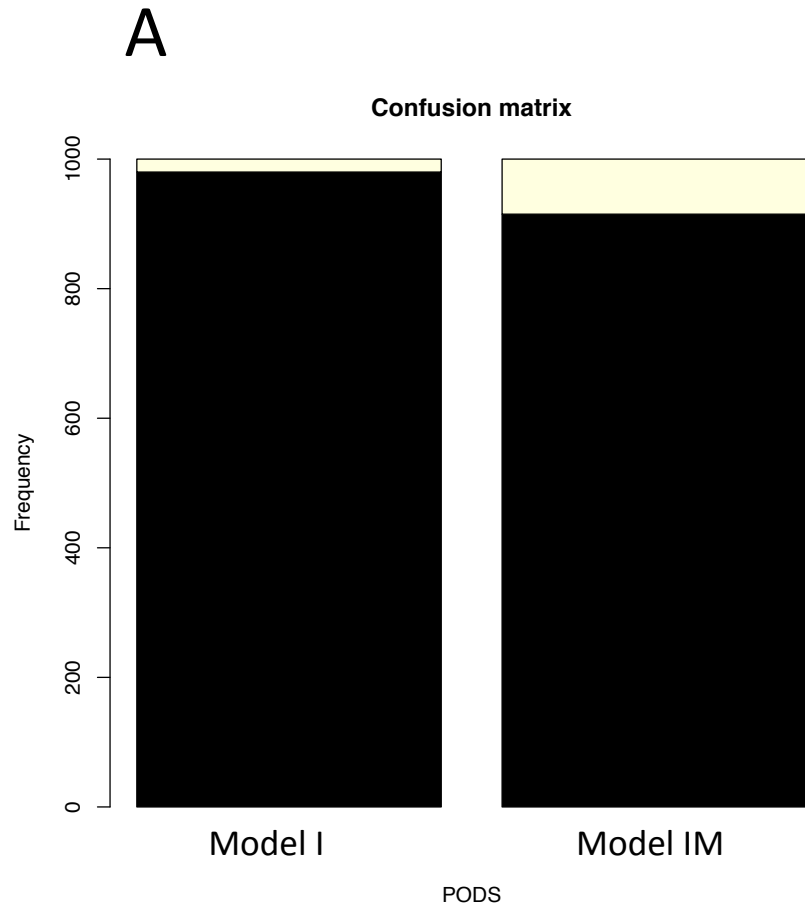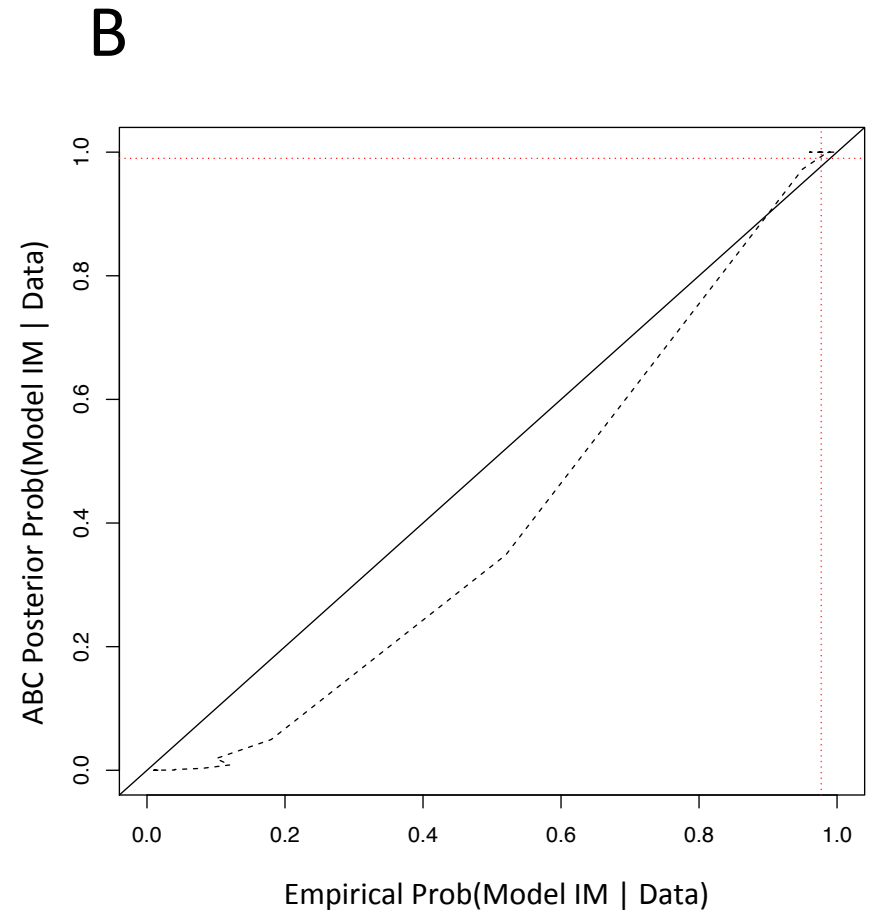



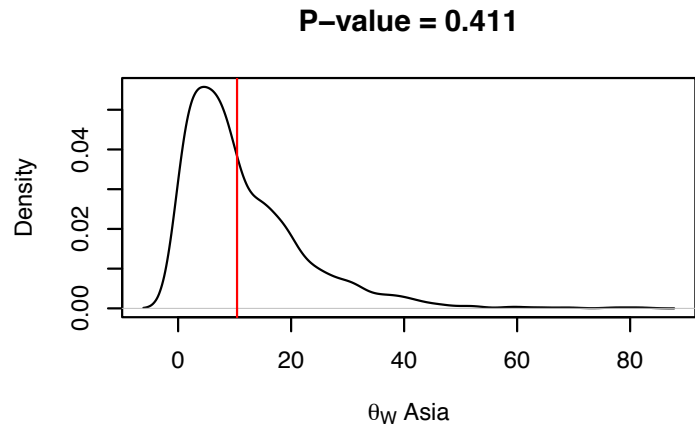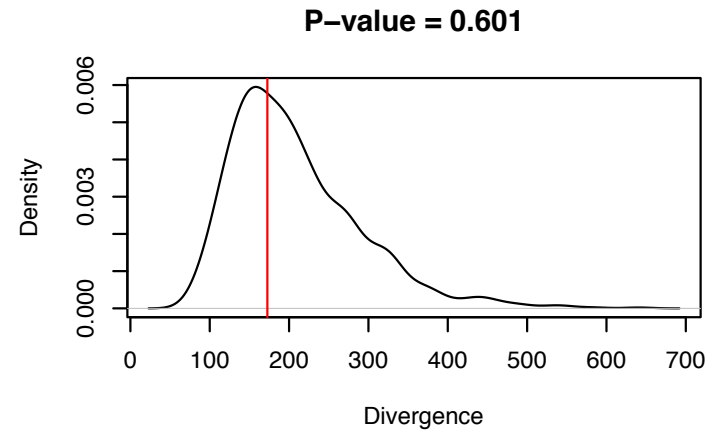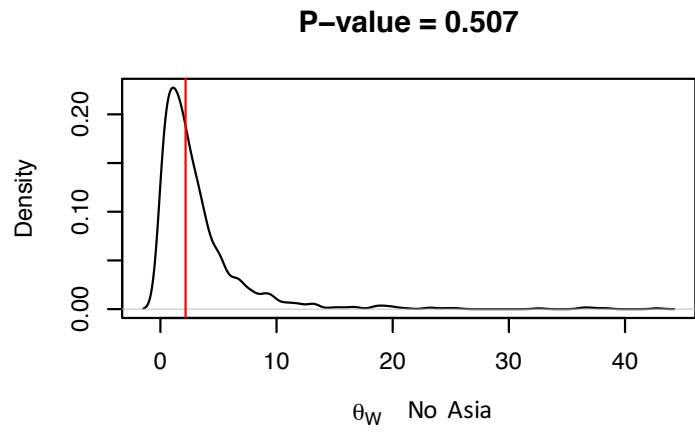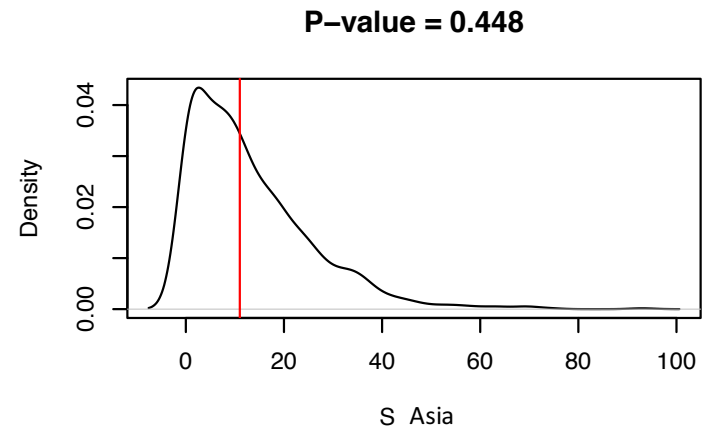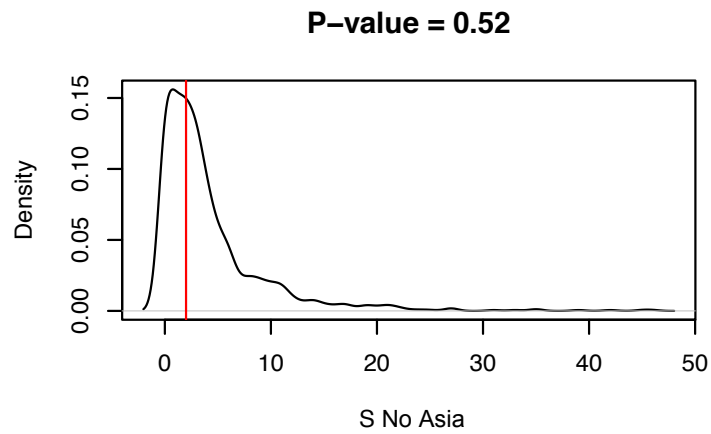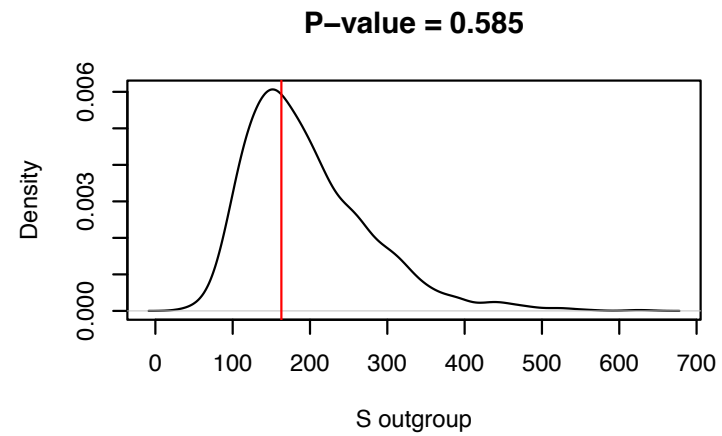

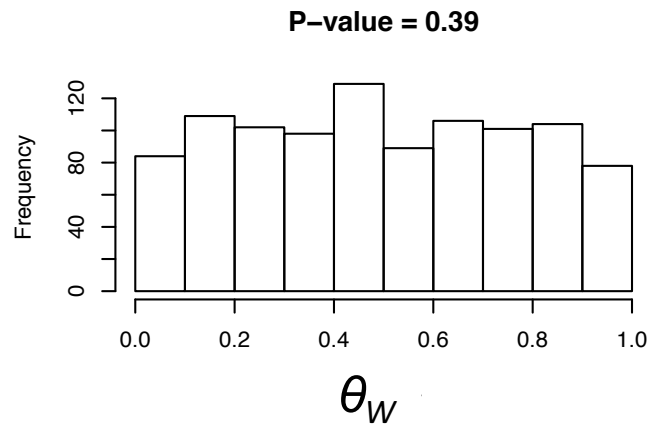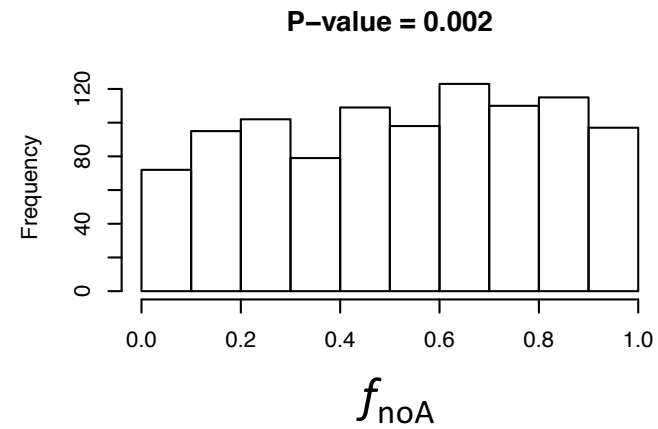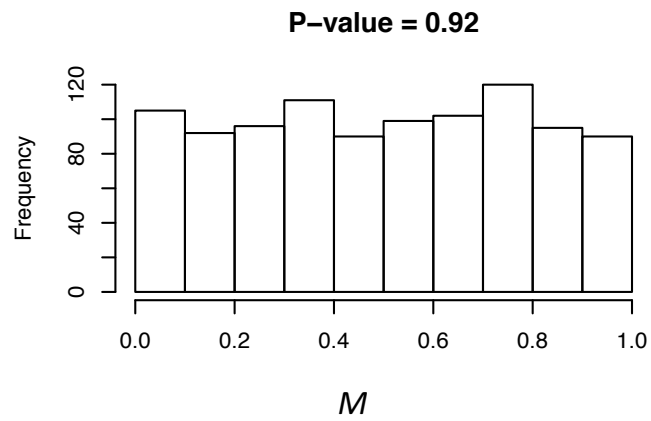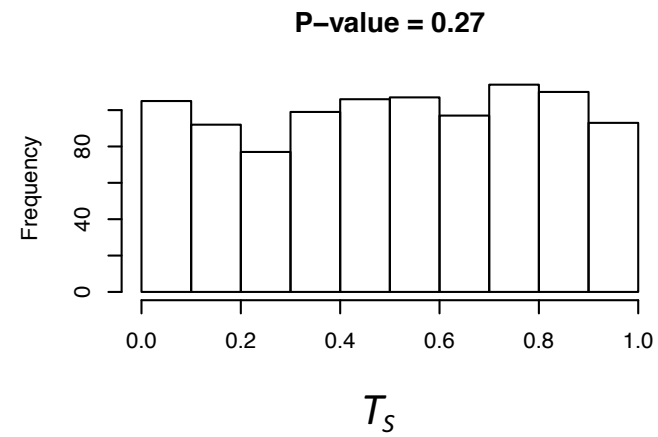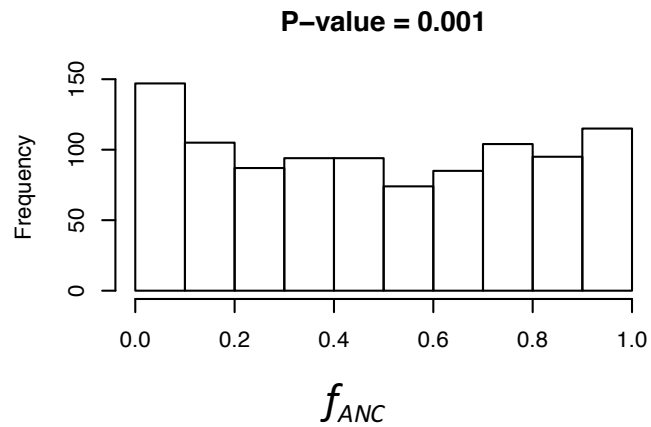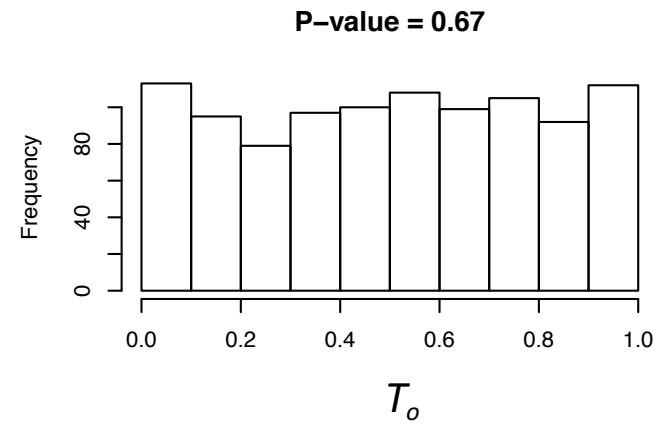

# A

## Pop2 (Asian): Chrom Y / Autosome

## Autosome: Pop1(non-Asian) / Pop2 (Asian)

Subdivision and Migration. Theta ratio Y/A.  
No Migration

Time mig

0.3974  
0.3158  
0.2510  
0.1993  
0.1576  
0.1251  
0.0995  
0.0790  
0.0628  
0.0500  
0.0397  
0.0315  
0.0250  
0.0198  
0.0158  
0.0125  
0.0100  
0.0079  
0.0063  
0.0050

0.2 0.235 0.276 0.324 0.381 0.447 0.526 0.618 0.725 0.852 1.003 1.178 1.384 1.627 1.91 2.244 2.634 3.092 3.634 4.262

ratio R/theta

Subdivision and Migration. LD ratio Y/A.  
No Migration

0.50  
0.45  
0.40  
0.35  
0.30  
0.25  
0.20  
0.15

Subdivision and Migration. Theta ratio Autosome non-mixed vs mixed.  
No Migration

Time mig

0.3974  
0.3158  
0.2510  
0.1993  
0.1576  
0.1251  
0.0995  
0.0790  
0.0628  
0.0500  
0.0397  
0.0315  
0.0250  
0.0198  
0.0158  
0.0125  
0.0100  
0.0079  
0.0063  
0.0050

0.2 0.235 0.276 0.324 0.381 0.447 0.526 0.618 0.725 0.852 1.003 1.178 1.384 1.627 1.91 2.244 2.634 3.092 3.634 4.262

ratio R/theta

Subdivision and Migration. LD ratio Autosome non-mixed vs mixed.  
No Migration

0.45  
0.40  
0.35  
0.30  
0.25  
0.20  
0.15  
0.10

Linkage  
Disequilibrium

Time mig

0.3974  
0.3158  
0.2510  
0.1993  
0.1576  
0.1251  
0.0995  
0.0790  
0.0628  
0.0500  
0.0397  
0.0315  
0.0250  
0.0198  
0.0158  
0.0125  
0.0100  
0.0079  
0.0063  
0.0050

0.2 0.235 0.276 0.324 0.381 0.447 0.526 0.618 0.725 0.852 1.003 1.178 1.384 1.627 1.91 2.244 2.634 3.092 3.634 4.262

ratio R/theta

Subdivision and Migration. LD ratio Autosome non-mixed vs mixed.  
No Migration

2.8  
2.6  
2.4  
2.2  
2.0

$O = W$

# B

## Pop2 (Asian): Chrom Y / Autosome

Subdivision and Migration. Theta ratio Y/A.  
Total Migration: 1.00 2.51

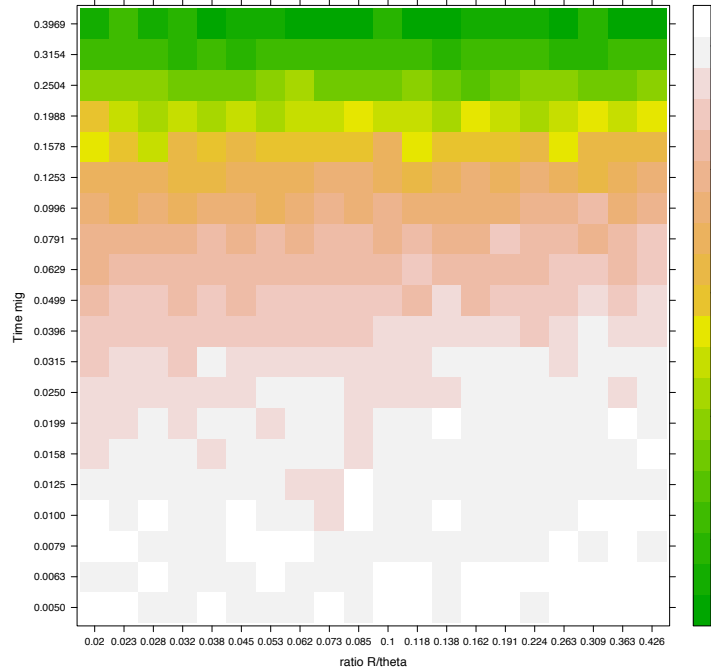

Variability

## Autosome: Pop1(non-Asian) / Pop2 (Asian)

Subdivision and Migration. Theta ratio Autosome non-mixed vs mixed.  
Total Migration: 1.00 2.51

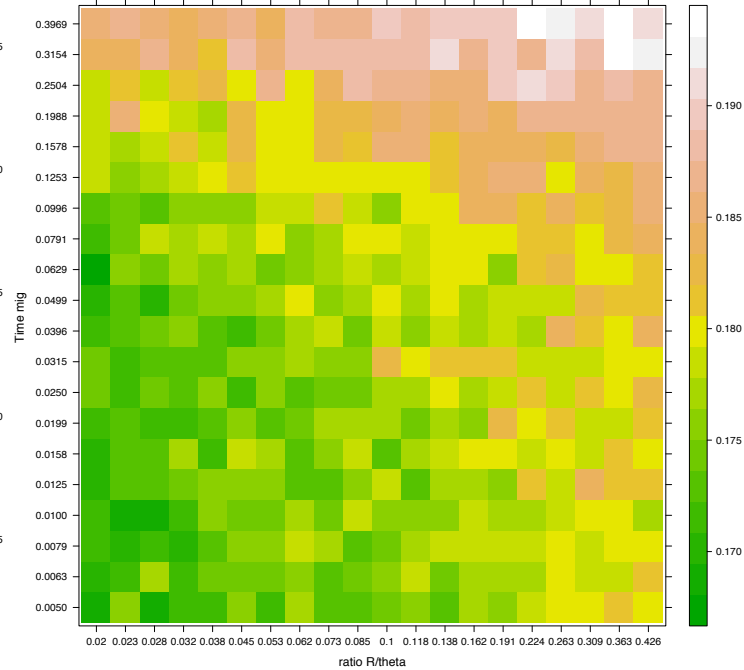

$M = \text{range}(10 : 25.1)$

Subdivision and Migration. LD ratio Y/A.  
Total Migration: 1.00 2.51

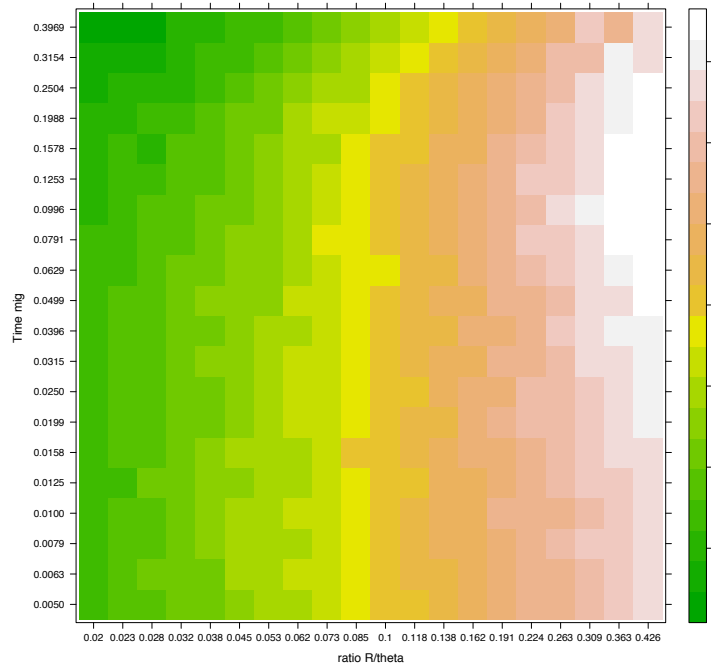

Linkage  
Disequilibrium

Subdivision and Migration. LD ratio Autosome non-mixed vs mixed.  
Total Migration: 1.00 2.51

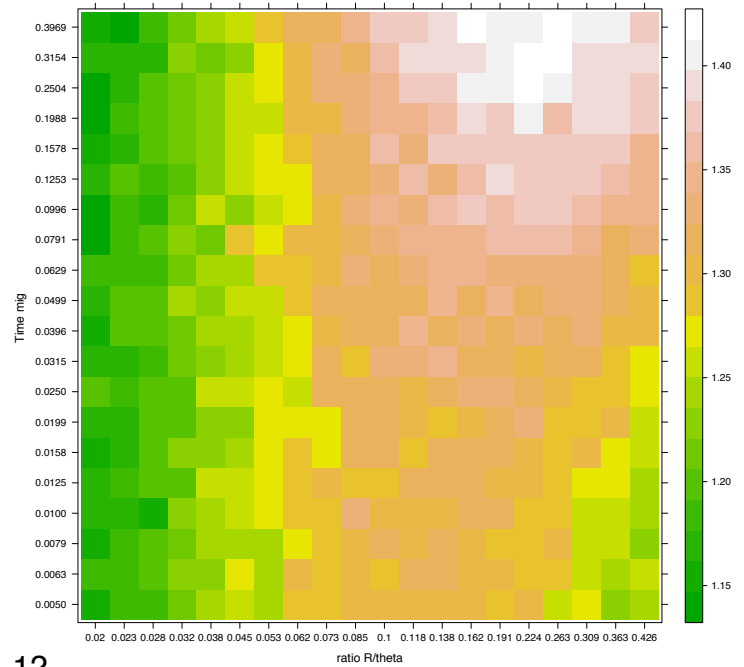

C

# Pop2 (Asian): Chrom Y / Autosome

Subdivision and Migration. Theta ratio Y/A.  
Total Migration: 2.51 6.31

Variability

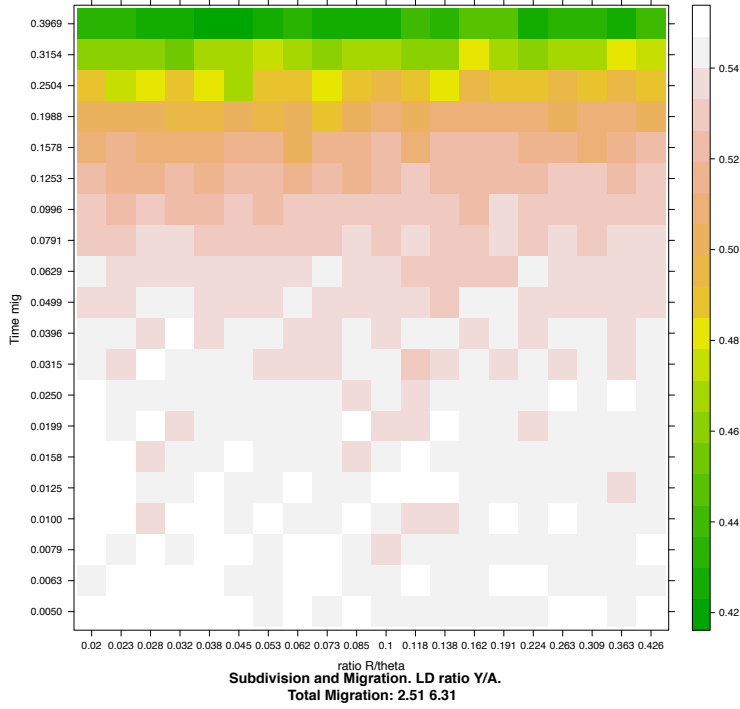

# Autosome: Pop1(non-Asian) / Pop2 (Asian)

Subdivision and Migration. Theta ratio Autosome non- mixed vs mixed.  
Total Migration: 2.51 6.31

M = range(25.1 : 63.1)

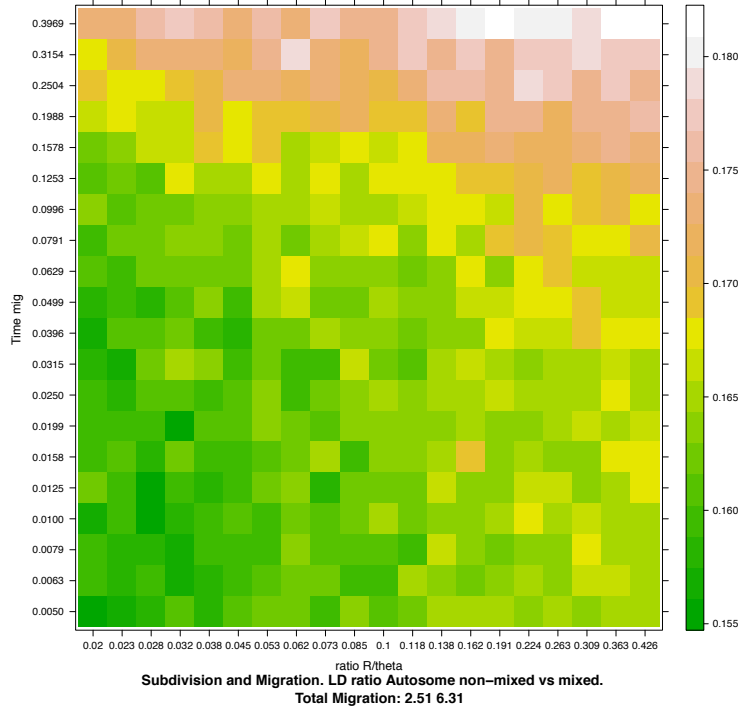

Linkage Disequilibrium

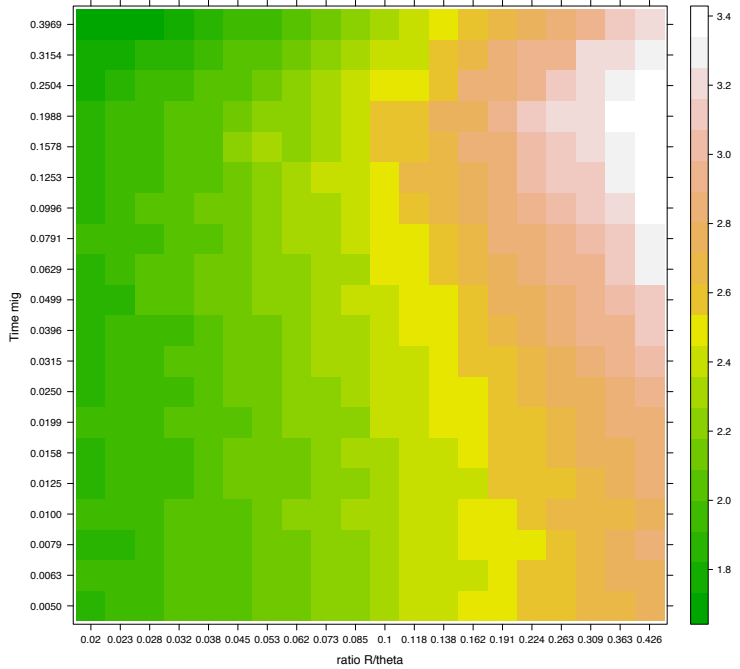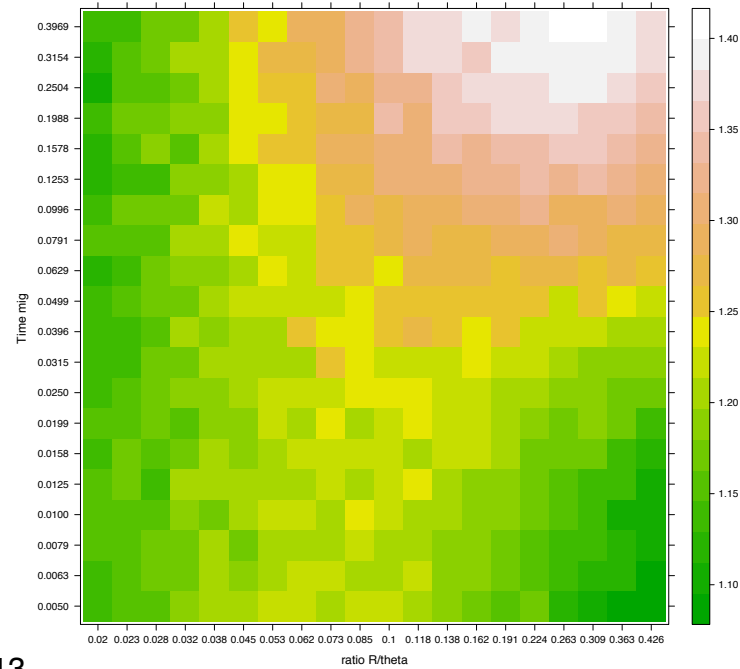

# D

## Pop2 (Asian): Chrom Y / Autosome

## Autosome: Pop1(non-Asian) / Pop2 (Asian)

Variability

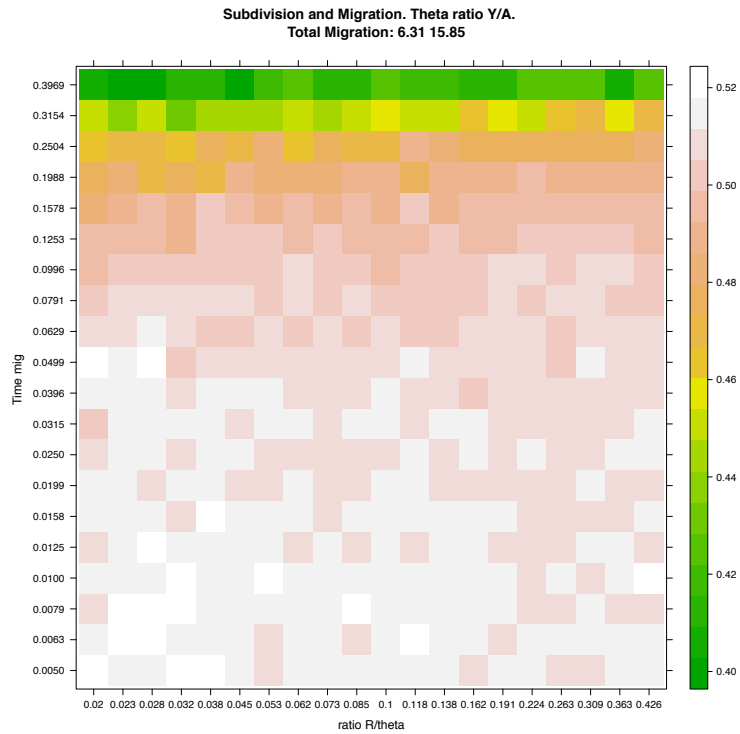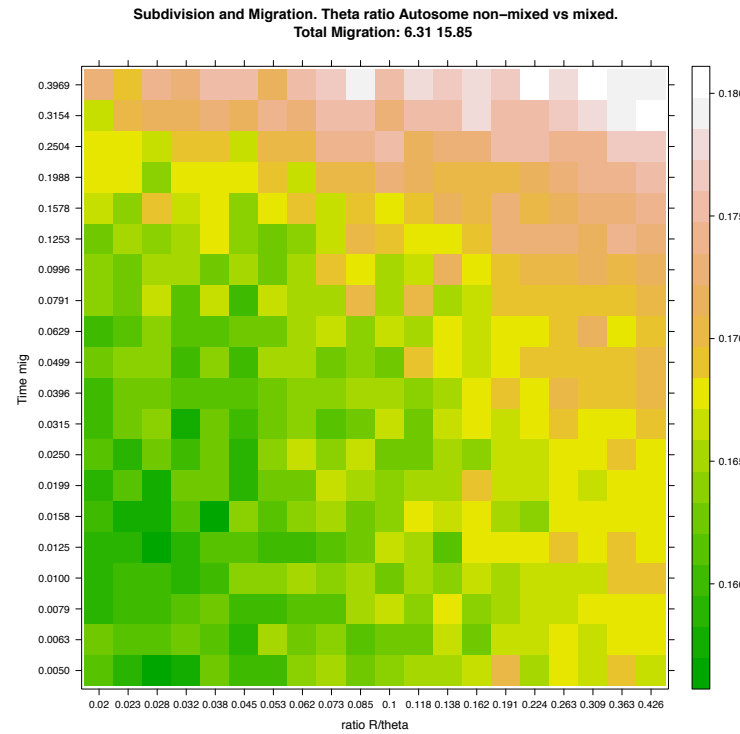

$M = \text{range}(63.1 : 158.5)$

Linkage Disequilibrium

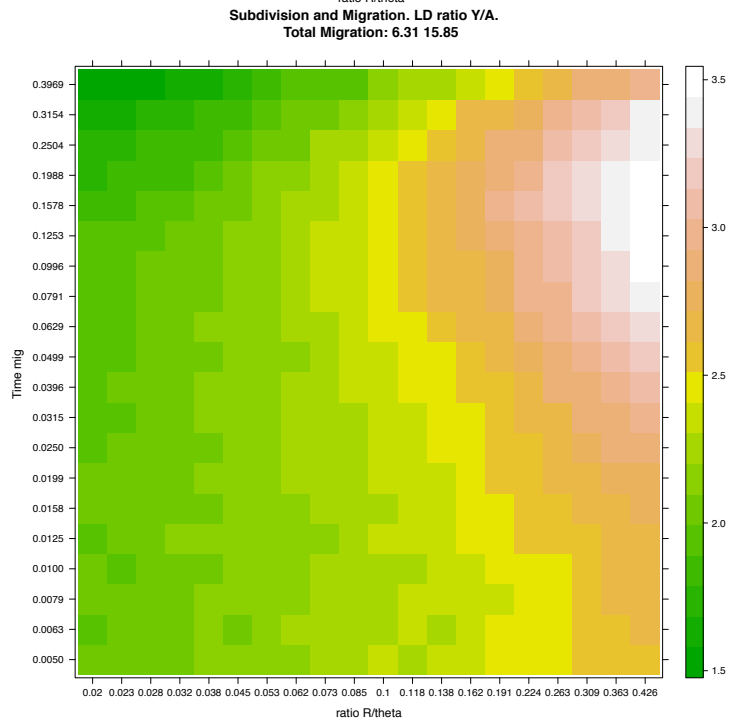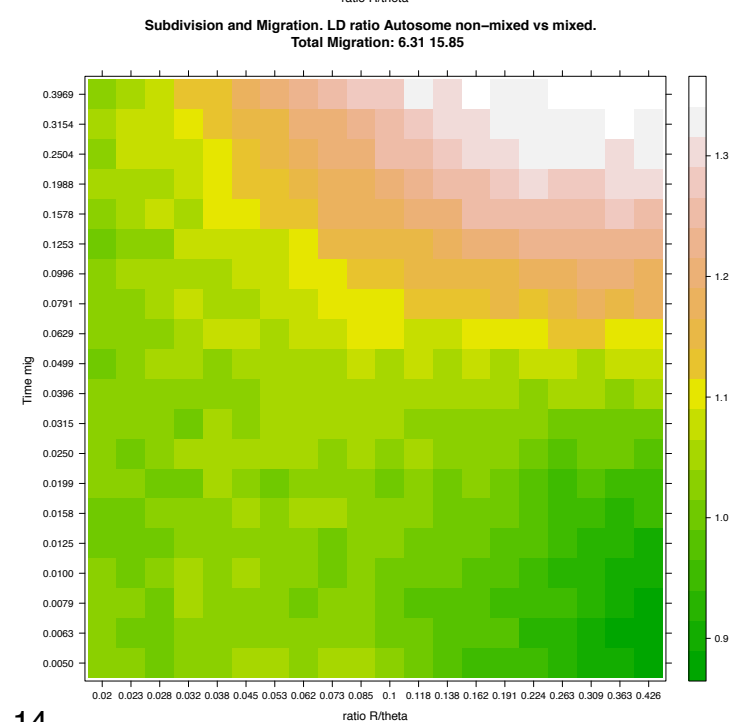

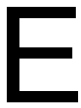

# Pop2 (Asian): Chrom Y / Autosome

Subdivision and Migration. Theta ratio Y/A.  
Total Migration: 15.85 39.81

Variability

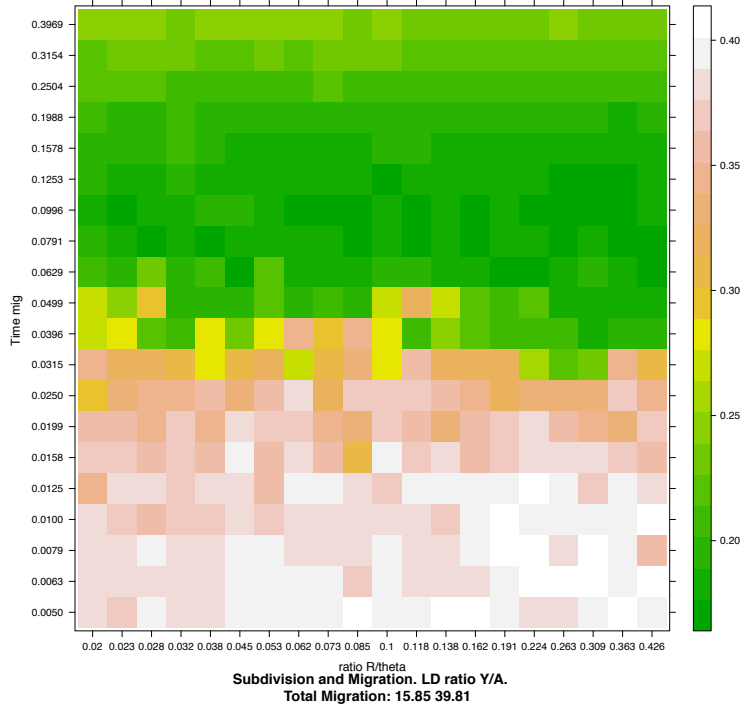

# Autosome: Pop1(non-Asian) / Pop2 (Asian)

Subdivision and Migration. Theta ratio Autosome non-mixed vs mixed.  
Total Migration: 15.85 39.81

M = range(158.5 : 398.1)

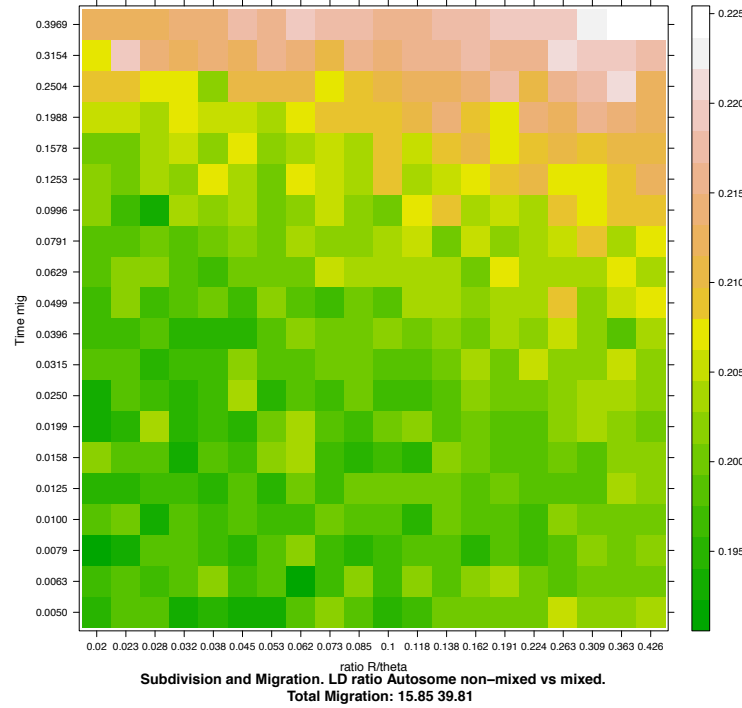

Linkage Disequilibrium

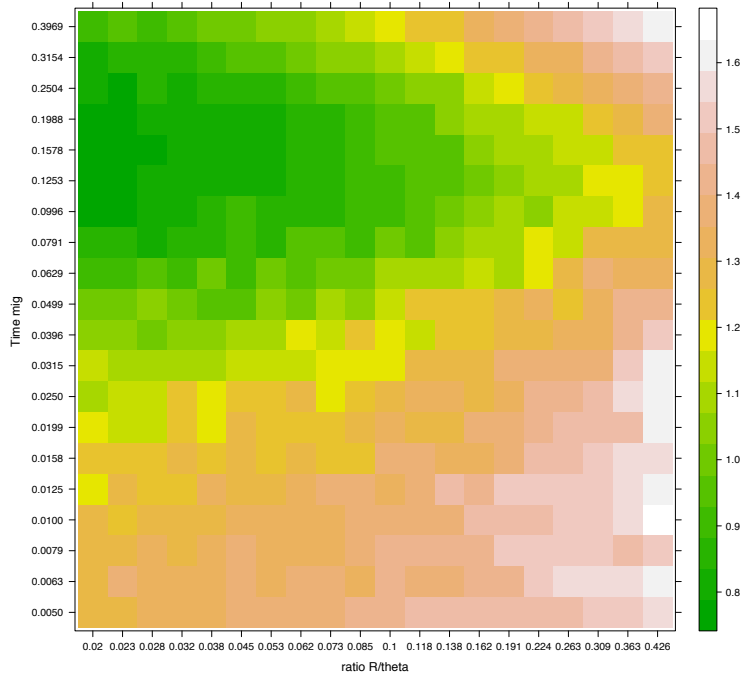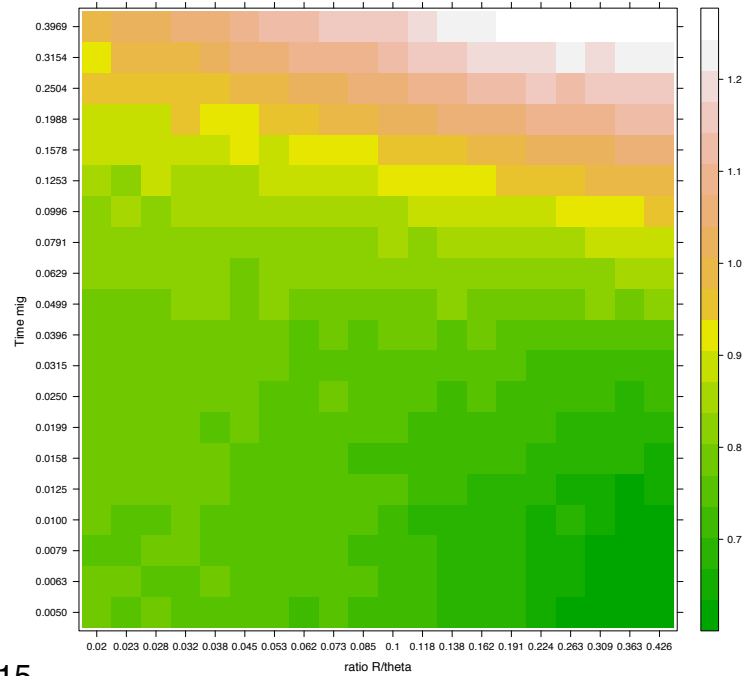

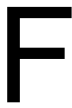

# Pop2 (Asian): Chrom Y / Autosome

Subdivision and Migration. Theta ratio Y/A.  
Total Migration: 39.81 100.00

Variability

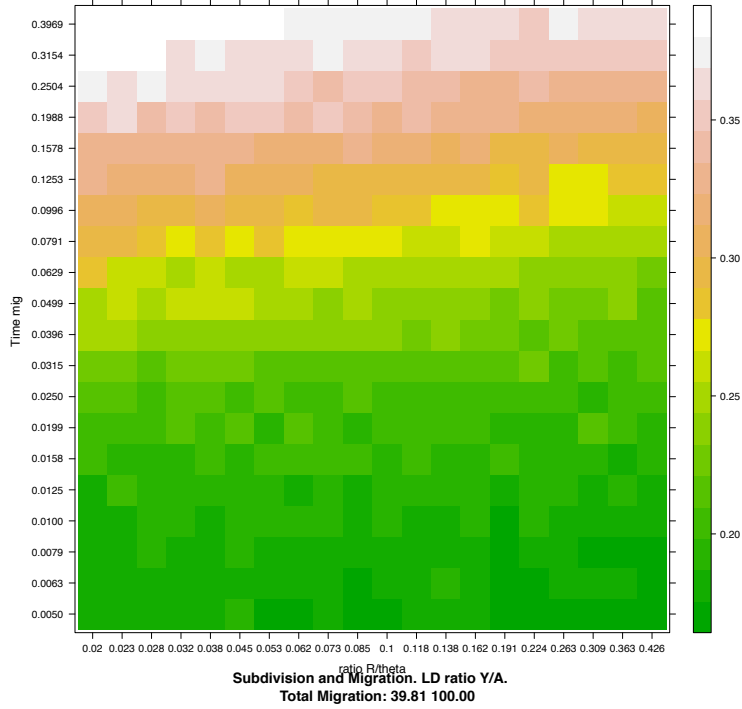

# Autosome: Pop1(non-Asian) / Pop2 (Asian)

Subdivision and Migration. LD ratio Autosome non-mixed vs mixed.  
Total Migration: 15.85 39.81

$M = \text{range}(398.1 : 1000)$

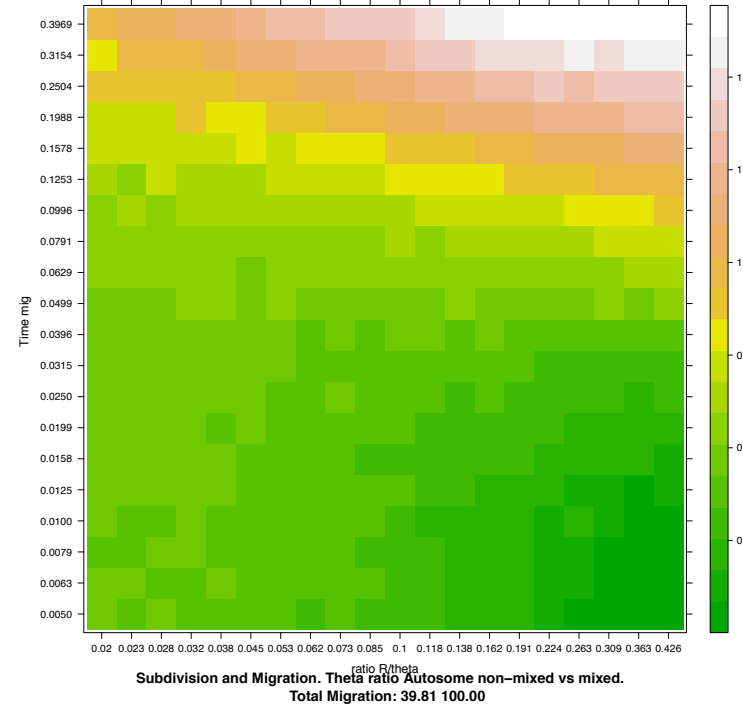

Linkage Disequilibrium

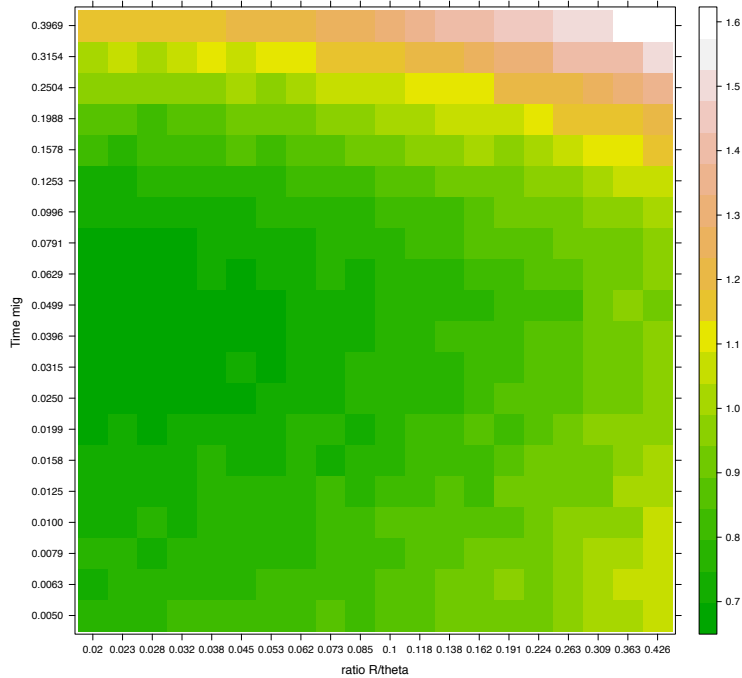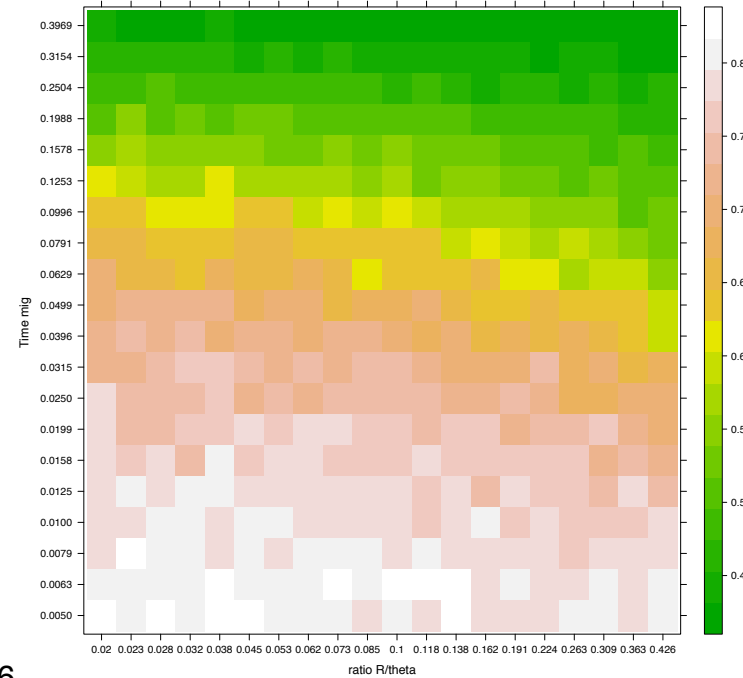



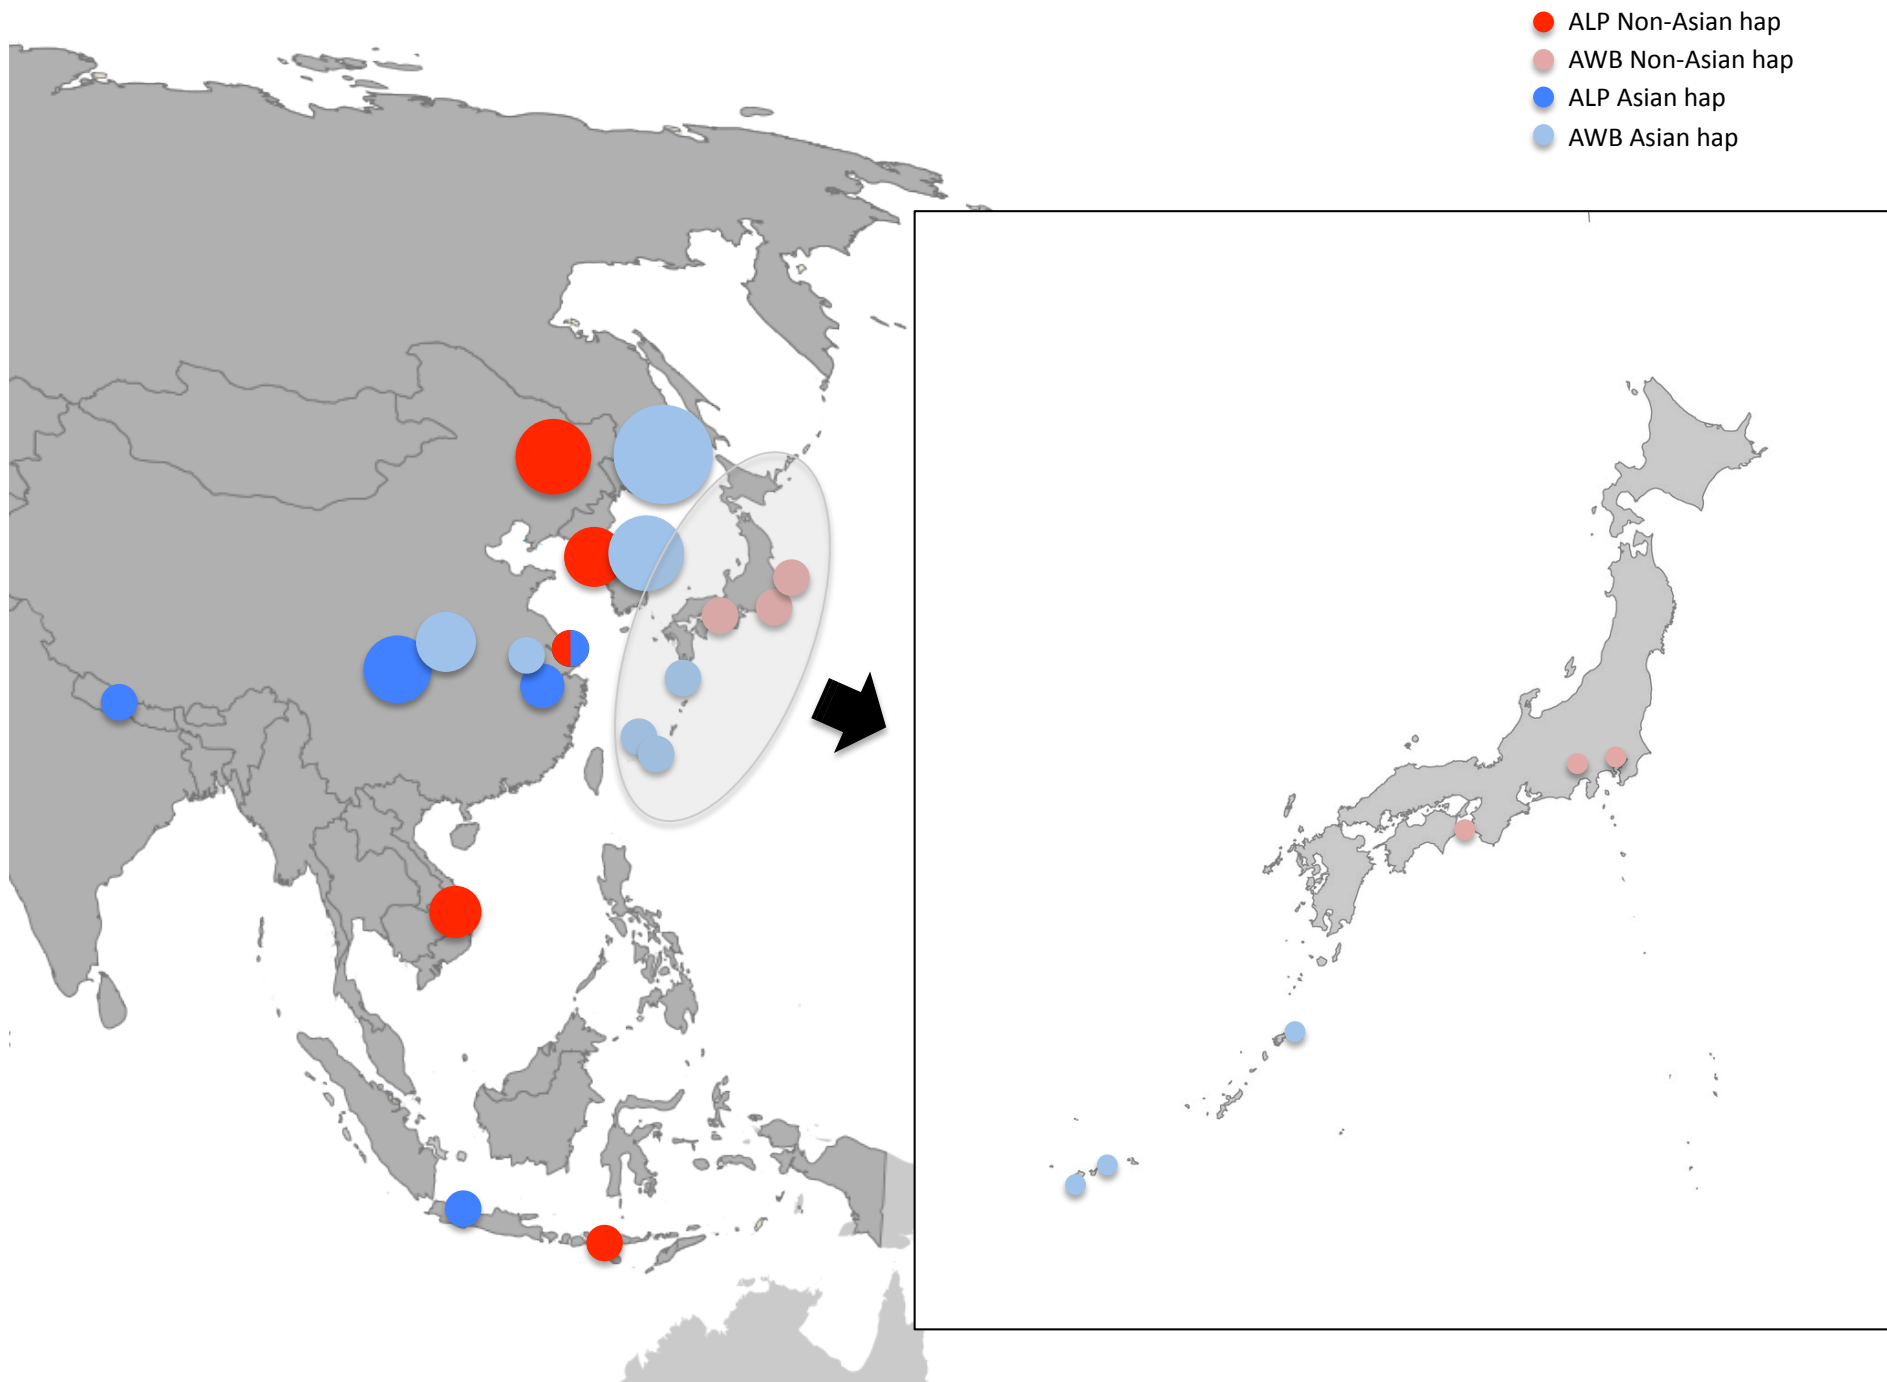

Figure S8

**Supplementary table S1.** Number of genotyped and sequenced samples for each group

| <b>Group</b>                                 | <b>Number of samples</b> |                  |
|----------------------------------------------|--------------------------|------------------|
|                                              | <b>Genotyped</b>         | <b>Sequenced</b> |
| <b>European Wild Boar (EWB)</b>              | 39                       | 2                |
| <b>Mediterranean Local Pig (MEDLP)</b>       | 20                       | 7                |
| <b>Commercial Pig (INTP)</b>                 | 62                       | 14               |
| <b>Anglo-Saxon Local Pig (ANGLP)</b>         | 29                       | 2                |
| <b>African Wild Boar (AFWB)</b>              | 5                        | 5                |
| <b>African Pig (AFP)</b>                     | 22                       | 5                |
| <b>Near-East Wild Boar (NEWB)</b>            | 2                        | 5                |
| <b>South and Central American Pig (SCAP)</b> | 17                       | 2                |
| <b>Asian Wild Boar (AWB)</b>                 | 22                       | 6                |
| <b>Asian Local Pig (ALP)</b>                 | 18                       | 3                |
| <b>OUTGROUPS</b>                             | 2                        | 2                |
| <b>TOTAL</b>                                 | 238                      | 53               |

| #NAME          | Species           | Origin         | Breed                | Population | Genotyped | Sequenced |
|----------------|-------------------|----------------|----------------------|------------|-----------|-----------|
| EWB_WBCZ0233   | <i>Sus scrofa</i> | Czech Republic | Wild boar            | EWB        | Yes       | No        |
| EWB_WBCZ1045   | <i>Sus scrofa</i> | Czech Republic | Wild boar            | EWB        | Yes       | No        |
| EWB_WBCZ1048   | <i>Sus scrofa</i> | Czech Republic | Wild boar            | EWB        | Yes       | No        |
| EWB_WBES0001   | <i>Sus scrofa</i> | Spain          | Wild boar            | EWB        | Yes       | No        |
| EWB_WBES0005   | <i>Sus scrofa</i> | Spain          | Wild boar            | EWB        | Yes       | No        |
| EWB_WBES0018   | <i>Sus scrofa</i> | Spain          | Wild boar            | EWB        | Yes       | No        |
| EWB_WBES0103   | <i>Sus scrofa</i> | Spain          | Wild boar            | EWB        | No        | Yes       |
| EWB_WBES0256   | <i>Sus scrofa</i> | Spain          | Wild boar            | EWB        | No        | Yes       |
| EWB_WBES0494   | <i>Sus scrofa</i> | Spain          | Wild boar            | EWB        | Yes       | No        |
| EWB_WBES0500   | <i>Sus scrofa</i> | Spain          | Wild boar            | EWB        | Yes       | No        |
| EWB_WBES0502   | <i>Sus scrofa</i> | Spain          | Wild boar            | EWB        | Yes       | No        |
| EWB_WBES0504   | <i>Sus scrofa</i> | Spain          | Wild boar            | EWB        | Yes       | No        |
| EWB_WBES0507   | <i>Sus scrofa</i> | Spain          | Wild boar            | EWB        | Yes       | No        |
| EWB_WBES0509   | <i>Sus scrofa</i> | Spain          | Wild boar            | EWB        | Yes       | No        |
| EWB_WBFI0313   | <i>Sus scrofa</i> | Finland        | Wild boar            | EWB        | Yes       | No        |
| EWB_WBFR0511   | <i>Sus scrofa</i> | France         | Wild boar            | EWB        | Yes       | No        |
| EWB_WBIT0077   | <i>Sus scrofa</i> | Italy          | Wild boar            | EWB        | Yes       | No        |
| EWB_WBIT0078   | <i>Sus scrofa</i> | Italy          | Wild boar            | EWB        | Yes       | No        |
| EWB_WBIT0080   | <i>Sus scrofa</i> | Italy          | Wild boar            | EWB        | Yes       | No        |
| EWB_WBIT0239   | <i>Sus scrofa</i> | Italy          | Wild boar            | EWB        | Yes       | No        |
| EWB_WBIT0240   | <i>Sus scrofa</i> | Italy          | Wild boar            | EWB        | Yes       | No        |
| EWB_WBIT0526   | <i>Sus scrofa</i> | Italy          | Wild boar            | EWB        | Yes       | No        |
| EWB_WBIT0770   | <i>Sus scrofa</i> | Italy          | Wild boar            | EWB        | Yes       | No        |
| EWB_WBIT0771   | <i>Sus scrofa</i> | Italy          | Wild boar            | EWB        | Yes       | No        |
| EWB_WBIT0775   | <i>Sus scrofa</i> | Italy          | Wild boar            | EWB        | Yes       | No        |
| EWB_WBIT0776   | <i>Sus scrofa</i> | Italy          | Wild boar            | EWB        | Yes       | No        |
| EWB_WBIT0780   | <i>Sus scrofa</i> | Italy          | Wild boar            | EWB        | Yes       | No        |
| EWB_WBIT0781   | <i>Sus scrofa</i> | Italy          | Wild boar            | EWB        | Yes       | No        |
| EWB_WBIT0783   | <i>Sus scrofa</i> | Italy          | Wild boar            | EWB        | Yes       | No        |
| EWB_WBIT0786   | <i>Sus scrofa</i> | Italy          | Wild boar            | EWB        | Yes       | No        |
| EWB_WBIT1038   | <i>Sus scrofa</i> | Italy          | Wild boar            | EWB        | Yes       | No        |
| EWB_WBIT1269   | <i>Sus scrofa</i> | Italy          | Wild boar            | EWB        | Yes       | No        |
| EWB_WBBE0263   | <i>Sus scrofa</i> | Belgium        | Wild boar            | EWB        | Yes       | No        |
| EWB_WBTN0960   | <i>Sus scrofa</i> | Tunisia        | Wild boar            | EWB        | Yes       | No        |
| EWB_WBTN0961   | <i>Sus scrofa</i> | Tunisia        | Wild boar            | EWB        | Yes       | No        |
| EWB_WBPO0374   | <i>Sus scrofa</i> | Poland         | Wild boar            | EWB        | Yes       | No        |
| EWB_WBPO0377   | <i>Sus scrofa</i> | Poland         | Wild boar            | EWB        | Yes       | No        |
| EWB_WBPO0989   | <i>Sus scrofa</i> | Poland         | Wild boar            | EWB        | Yes       | No        |
| EWB_WBPO0992   | <i>Sus scrofa</i> | Poland         | Wild boar            | EWB        | Yes       | No        |
| EWB_WBPT0438   | <i>Sus scrofa</i> | Portugal       | Wild boar            | EWB        | Yes       | No        |
| EWB_WBRU0279   | <i>Sus scrofa</i> | Russia         | Wild boar            | EWB        | Yes       | No        |
| MEDLP_IBES0002 | <i>Sus scrofa</i> | Spain          | Iberian              | MEDLP      | No        | Yes       |
| MEDLP_IBES0073 | <i>Sus scrofa</i> | Spain          | Iberian              | MEDLP      | No        | Yes       |
| MEDLP_IBES0106 | <i>Sus scrofa</i> | Spain          | Iberian              | MEDLP      | Yes       | Yes       |
| MEDLP_IBES0109 | <i>Sus scrofa</i> | Spain          | Iberian              | MEDLP      | Yes       | No        |
| MEDLP_IBES0113 | <i>Sus scrofa</i> | Spain          | Iberian              | MEDLP      | Yes       | No        |
| MEDLP_IBES0161 | <i>Sus scrofa</i> | Spain          | Iberian              | MEDLP      | Yes       | No        |
| MEDLP_IBES0163 | <i>Sus scrofa</i> | Spain          | Iberian              | MEDLP      | Yes       | No        |
| MEDLP_IBES0247 | <i>Sus scrofa</i> | Spain          | Iberian              | MEDLP      | No        | Yes       |
| MEDLP_IBES0273 | <i>Sus scrofa</i> | Spain          | Iberian              | MEDLP      | Yes       | No        |
| MEDLP_IBES0323 | <i>Sus scrofa</i> | Spain          | Iberian              | MEDLP      | Yes       | No        |
| MEDLP_IBES0325 | <i>Sus scrofa</i> | Spain          | Iberian              | MEDLP      | Yes       | No        |
| MEDLP_IBES0475 | <i>Sus scrofa</i> | Spain          | Iberian              | MEDLP      | Yes       | Yes       |
| MEDLP_IBES0521 | <i>Sus scrofa</i> | Spain          | Iberian              | MEDLP      | Yes       | No        |
| MEDLP_IBES0539 | <i>Sus scrofa</i> | Spain          | Iberian              | MEDLP      | Yes       | No        |
| MEDLP_IBES0541 | <i>Sus scrofa</i> | Spain          | Iberian              | MEDLP      | No        | Yes       |
| MEDLP_IBES0787 | <i>Sus scrofa</i> | Spain          | Iberian              | MEDLP      | Yes       | No        |
| MEDLP_IBES1192 | <i>Sus scrofa</i> | Spain          | Iberian              | MEDLP      | Yes       | No        |
| MEDLP_COFR0332 | <i>Sus scrofa</i> | France         | Corsican             | MEDLP      | Yes       | No        |
| MEDLP_COFR0334 | <i>Sus scrofa</i> | France         | Corsican             | MEDLP      | Yes       | No        |
| MEDLP_MGHU0093 | <i>Sus scrofa</i> | Hungary        | Mangalitza           | MEDLP      | Yes       | No        |
| MEDLP_MGHU0095 | <i>Sus scrofa</i> | Hungary        | Mangalitza           | MEDLP      | Yes       | No        |
| MEDLP_MGHU0098 | <i>Sus scrofa</i> | Hungary        | Mangalitza           | MEDLP      | Yes       | No        |
| MEDLP_PAPT0434 | <i>Sus scrofa</i> | Portugal       | Alentejan Black Pig  | MEDLP      | Yes       | No        |
| MEDLP_SIT1029  | <i>Sus scrofa</i> | Italy          | Sicilian Black Swine | MEDLP      | Yes       | No        |
| MEDLP_PNES0147 | <i>Sus scrofa</i> | Spain          | Majorcan Black       | MEDLP      | Yes       | No        |
| MEDLP_PNES0155 | <i>Sus scrofa</i> | Spain          | Majorcan Black       | MEDLP      | No        | Yes       |
| ANGLP_BKGB0366 | <i>Sus scrofa</i> | Great Britain  | Berkshire            | ANGLP      | Yes       | No        |
| ANGLP_BKGB0367 | <i>Sus scrofa</i> | Great Britain  | Berkshire            | ANGLP      | Yes       | No        |
| ANGLP_BKGB0752 | <i>Sus scrofa</i> | Great Britain  | Berkshire            | ANGLP      | Yes       | No        |
| ANGLP_BKUS0622 | <i>Sus scrofa</i> | United States  | Berkshire            | ANGLP      | Yes       | No        |
| ANGLP_BKUS0624 | <i>Sus scrofa</i> | United States  | Berkshire            | ANGLP      | Yes       | No        |
| ANGLP_BKUS0626 | <i>Sus scrofa</i> | United States  | Berkshire            | ANGLP      | Yes       | No        |
| ANGLP_BLGB0373 | <i>Sus scrofa</i> | Great Britain  | British Lop          | ANGLP      | Yes       | No        |

|                |                   |               |               |       |     |     |
|----------------|-------------------|---------------|---------------|-------|-----|-----|
| ANGLP_CWUS0640 | <i>Sus scrofa</i> | United States | Chester White | ANGLP | Yes | No  |
| ANGLP_CWUS0641 | <i>Sus scrofa</i> | United States | Chester White | ANGLP | Yes | No  |
| ANGLP_LBGB0361 | <i>Sus scrofa</i> | Great Britain | Large Black   | ANGLP | Yes | No  |
| ANGLP_LBGB0362 | <i>Sus scrofa</i> | Great Britain | Large Black   | ANGLP | Yes | No  |
| ANGLP_LBGB0619 | <i>Sus scrofa</i> | Great Britain | Large Black   | ANGLP | Yes | No  |
| ANGLP_LBGB0744 | <i>Sus scrofa</i> | Great Britain | Large Black   | ANGLP | Yes | No  |
| ANGLP_MWGB0359 | <i>Sus scrofa</i> | Great Britain | Middle White  | ANGLP | Yes | No  |
| ANGLP_MWGB0360 | <i>Sus scrofa</i> | Great Britain | Middle White  | ANGLP | Yes | No  |
| ANGLP_MWGB0743 | <i>Sus scrofa</i> | Great Britain | Middle White  | ANGLP | Yes | No  |
| ANGLP_OSGB0368 | <i>Sus scrofa</i> | Great Britain | Old Spot      | ANGLP | Yes | No  |
| ANGLP_OSGB0369 | <i>Sus scrofa</i> | Great Britain | Old Spot      | ANGLP | Yes | No  |
| ANGLP_OSGB0740 | <i>Sus scrofa</i> | Great Britain | Old Spot      | ANGLP | Yes | No  |
| ANGLP_OSGB0985 | <i>Sus scrofa</i> | Great Britain | Old Spot      | ANGLP | Yes | No  |
| ANGLP_PLUS0638 | <i>Sus scrofa</i> | United States | Poland China  | ANGLP | Yes | No  |
| ANGLP_PLUS0639 | <i>Sus scrofa</i> | United States | Poland China  | ANGLP | Yes | No  |
| ANGLP_SBGB0363 | <i>Sus scrofa</i> | Great Britain | Saddleback    | ANGLP | Yes | No  |
| ANGLP_SBGB0364 | <i>Sus scrofa</i> | Great Britain | Saddleback    | ANGLP | Yes | No  |
| ANGLP_WEGB0746 | <i>Sus scrofa</i> | Great Britain | Welsh         | ANGLP | Yes | No  |
| ANGLP_SBGB0756 | <i>Sus scrofa</i> | Great Britain | Saddleback    | ANGLP | Yes | No  |
| ANGLP_TWGB0371 | <i>Sus scrofa</i> | Great Britain | Tamworth      | ANGLP | Yes | Yes |
| ANGLP_TWGB0372 | <i>Sus scrofa</i> | Great Britain | Tamworth      | ANGLP | Yes | Yes |
| ANGLP_TWGB0748 | <i>Sus scrofa</i> | Great Britain | Tamworth      | ANGLP | Yes | No  |
| INTP_DUDK0474  | <i>Sus scrofa</i> | Denmark       | Duroc         | INTP  | Yes | No  |
| INTP_DUES0169  | <i>Sus scrofa</i> | Spain         | Duroc         | INTP  | Yes | No  |
| INTP_DUES0188  | <i>Sus scrofa</i> | Spain         | Duroc         | INTP  | No  | Yes |
| INTP_DUES0194  | <i>Sus scrofa</i> | Spain         | Duroc         | INTP  | Yes | No  |
| INTP_DUES0277  | <i>Sus scrofa</i> | Spain         | Duroc         | INTP  | Yes | No  |
| INTP_DUES0460  | <i>Sus scrofa</i> | Spain         | Duroc         | INTP  | Yes | No  |
| INTP_DUES0538  | <i>Sus scrofa</i> | Spain         | Duroc         | INTP  | Yes | No  |
| INTP_DUGB0353  | <i>Sus scrofa</i> | Great Britain | Duroc         | INTP  | Yes | Yes |
| INTP_DUGB0355  | <i>Sus scrofa</i> | Great Britain | Duroc         | INTP  | Yes | No  |
| INTP_DUGB0356  | <i>Sus scrofa</i> | Great Britain | Duroc         | INTP  | Yes | No  |
| INTP_DUGB0357  | <i>Sus scrofa</i> | Great Britain | Duroc         | INTP  | Yes | No  |
| INTP_DUHU0199  | <i>Sus scrofa</i> | Hungary       | Duroc         | INTP  | Yes | No  |
| INTP_DUHU0202  | <i>Sus scrofa</i> | Hungary       | Duroc         | INTP  | Yes | No  |
| INTP_DUNO0087  | <i>Sus scrofa</i> | Norway        | Duroc         | INTP  | Yes | No  |
| INTP_DUNO0088  | <i>Sus scrofa</i> | Norway        | Duroc         | INTP  | Yes | No  |
| INTP_DUUS0458  | <i>Sus scrofa</i> | United States | Duroc         | INTP  | Yes | No  |
| INTP_DUUS0602  | <i>Sus scrofa</i> | United States | Duroc         | INTP  | Yes | No  |
| INTP_DUUS0603  | <i>Sus scrofa</i> | United States | Duroc         | INTP  | Yes | No  |
| INTP_DUUS0604  | <i>Sus scrofa</i> | United States | Duroc         | INTP  | Yes | No  |
| INTP_DUUS0605  | <i>Sus scrofa</i> | United States | Duroc         | INTP  | Yes | No  |
| INTP_DUUS0613  | <i>Sus scrofa</i> | United States | Duroc         | INTP  | Yes | No  |
| INTP_HSGB0977  | <i>Sus scrofa</i> | Great Britain | Duroc         | INTP  | Yes | No  |
| INTP_HSUS0614  | <i>Sus scrofa</i> | United States | Duroc         | INTP  | Yes | No  |
| INTP_HSUS0615  | <i>Sus scrofa</i> | United States | Duroc         | INTP  | Yes | No  |
| INTP_HSUS0616  | <i>Sus scrofa</i> | United States | Duroc         | INTP  | Yes | No  |
| INTP_HSUS0618  | <i>Sus scrofa</i> | United States | Duroc         | INTP  | Yes | No  |
| INTP_LDES0423  | <i>Sus scrofa</i> | Spain         | Landrace      | INTP  | No  | Yes |
| INTP_LRES0285  | <i>Sus scrofa</i> | Spain         | Landrace      | INTP  | Yes | No  |
| INTP_LRES0400  | <i>Sus scrofa</i> | Spain         | Landrace      | INTP  | No  | Yes |
| INTP_LRES0465  | <i>Sus scrofa</i> | Spain         | Landrace      | INTP  | Yes | No  |
| INTP_LRGB0336  | <i>Sus scrofa</i> | Great Britain | Landrace      | INTP  | Yes | No  |
| INTP_LRGB0338  | <i>Sus scrofa</i> | Great Britain | Landrace      | INTP  | Yes | Yes |
| INTP_LRGB0339  | <i>Sus scrofa</i> | Great Britain | Landrace      | INTP  | Yes | No  |
| INTP_LRGB0341  | <i>Sus scrofa</i> | Great Britain | Landrace      | INTP  | Yes | No  |
| INTP_LRGB0342  | <i>Sus scrofa</i> | Great Britain | Landrace      | INTP  | Yes | No  |
| INTP_LRGB0967  | <i>Sus scrofa</i> | Great Britain | Landrace      | INTP  | Yes | No  |
| INTP_LRUS0633  | <i>Sus scrofa</i> | United States | Landrace      | INTP  | Yes | No  |
| INTP_LRUS0635  | <i>Sus scrofa</i> | United States | Landrace      | INTP  | Yes | No  |
| INTP_LRUS0637  | <i>Sus scrofa</i> | United States | Landrace      | INTP  | Yes | No  |
| INTP_LWDK0473  | <i>Sus scrofa</i> | Denmark       | Large White   | INTP  | Yes | No  |
| INTP_LWES0284  | <i>Sus scrofa</i> | Spain         | Large White   | INTP  | Yes | Yes |
| INTP_LWES0477  | <i>Sus scrofa</i> | Spain         | Large White   | INTP  | Yes | Yes |
| INTP_LWES0509  | <i>Sus scrofa</i> | Spain         | Large White   | INTP  | No  | Yes |
| INTP_LWFI0343  | <i>Sus scrofa</i> | Finland       | Large White   | INTP  | Yes | No  |
| INTP_LWFR0351  | <i>Sus scrofa</i> | France        | Large White   | INTP  | Yes | No  |
| INTP_LWFR0352  | <i>Sus scrofa</i> | France        | Large White   | INTP  | Yes | No  |
| INTP_LWGB0344  | <i>Sus scrofa</i> | Great Britain | Large White   | INTP  | Yes | No  |
| INTP_LWGB0345  | <i>Sus scrofa</i> | Great Britain | Large White   | INTP  | Yes | Yes |
| INTP_LWGB0348  | <i>Sus scrofa</i> | Great Britain | Large White   | INTP  | Yes | No  |
| INTP_LWGB0349  | <i>Sus scrofa</i> | Great Britain | Large White   | INTP  | Yes | No  |
| INTP_LWGB0350  | <i>Sus scrofa</i> | Great Britain | Large White   | INTP  | Yes | No  |
| INTP_LWGB0987  | <i>Sus scrofa</i> | Great Britain | Large White   | INTP  | Yes | No  |
| INTP_PIDE0463  | <i>Sus scrofa</i> | Germany       | Pietrain      | INTP  | Yes | No  |
| INTP_PIDE0478  | <i>Sus scrofa</i> | Germany       | Pietrain      | INTP  | Yes | No  |

|                |                   |               |            |      |     |     |
|----------------|-------------------|---------------|------------|------|-----|-----|
| INTP_PIES0464  | <i>Sus scrofa</i> | Spain         | Pietrain   | INTP | Yes | No  |
| INTP_PIES0470  | <i>Sus scrofa</i> | Spain         | Pietrain   | INTP | Yes | No  |
| INTP_PIES0459  | <i>Sus scrofa</i> | Spain         | Pietrain   | INTP | No  | Yes |
| INTP_PIFR0479  | <i>Sus scrofa</i> | France        | Pietrain   | INTP | Yes | No  |
| INTP_PTES0501  | <i>Sus scrofa</i> | Spain         | Pietrain   | INTP | No  | Yes |
| INTP_PTES0505  | <i>Sus scrofa</i> | Spain         | Pietrain   | INTP | No  | Yes |
| INTP_PTES0506  | <i>Sus scrofa</i> | Spain         | Pietrain   | INTP | No  | Yes |
| INTP_PIGB0478  | <i>Sus scrofa</i> | Great Britain | Pietrain   | INTP | No  | Yes |
| INTP_PIGB0747  | <i>Sus scrofa</i> | Great Britain | Pietrain   | INTP | Yes | No  |
| INTP_SYES0472  | <i>Sus scrofa</i> | Spain         | Synthetic  | INTP | Yes | No  |
| INTP_YKUS0627  | <i>Sus scrofa</i> | United States | Yucatan    | INTP | Yes | No  |
| INTP_YKUS0628  | <i>Sus scrofa</i> | United States | Yucatan    | INTP | Yes | No  |
| INTP_YKUS0631  | <i>Sus scrofa</i> | United States | Yucatan    | INTP | Yes | No  |
| INT_MPES0758   | <i>Sus scrofa</i> | Spain         | Minipig    | INTP | Yes | No  |
| INT_MPES0759   | <i>Sus scrofa</i> | Spain         | Minipig    | INTP | Yes | No  |
| INT_MPES0760   | <i>Sus scrofa</i> | Spain         | Minipig    | INTP | Yes | No  |
| INT_MPKD0728   | <i>Sus scrofa</i> | Denmark       | Minipig    | INTP | Yes | No  |
| INT_MPKD1034   | <i>Sus scrofa</i> | Denmark       | Minipig    | INTP | Yes | No  |
| AFWB_WBTN0226  | <i>Sus scrofa</i> | Tunisia       | Wild boar  | AFWB | No  | Yes |
| AFWB_WBTN0228  | <i>Sus scrofa</i> | Tunisia       | Wild boar  | AFWB | No  | Yes |
| AFWB_WBTN0229  | <i>Sus scrofa</i> | Tunisia       | Wild boar  | AFWB | No  | Yes |
| AFWB_WBTN0230  | <i>Sus scrofa</i> | Tunisia       | Wild boar  | AFWB | No  | Yes |
| AFWB_WBTN0231  | <i>Sus scrofa</i> | Tunisia       | Wild boar  | AFWB | No  | Yes |
| AFWB_WBTN0962  | <i>Sus scrofa</i> | Tunisia       | Wild boar  | AFWB | Yes | No  |
| AFWB_WBTN0963  | <i>Sus scrofa</i> | Tunisia       | Wild boar  | AFWB | Yes | No  |
| AFWB_WBTN0964  | <i>Sus scrofa</i> | Tunisia       | Wild boar  | AFWB | Yes | No  |
| AFWB_NEWB0517  | <i>Sus scrofa</i> | Turkey        | Wild boar  | AFWB | Yes | No  |
| AFWB_NEWB1271  | <i>Sus scrofa</i> | Turkey        | Wild boar  | AFWB | Yes | No  |
| AFP_NABE0024   | <i>Sus scrofa</i> | Benin         | native pig | AFP  | No  | Yes |
| AFP_NABE0025   | <i>Sus scrofa</i> | Benin         | native pig | AFP  | No  | Yes |
| AFP_NABF0913   | <i>Sus scrofa</i> | Burkina Faso  | native pig | AFP  | Yes | No  |
| AFP_NABF0922   | <i>Sus scrofa</i> | Burkina Faso  | native pig | AFP  | Yes | No  |
| AFP_NABF0923   | <i>Sus scrofa</i> | Burkina Faso  | native pig | AFP  | Yes | No  |
| AFP_NABF0927   | <i>Sus scrofa</i> | Burkina Faso  | native pig | AFP  | Yes | No  |
| AFP_NACI0911   | <i>Sus scrofa</i> | Ivory Coast   | native pig | AFP  | Yes | No  |
| AFP_NAKE0131   | <i>Sus scrofa</i> | Kenia         | native pig | AFP  | No  | Yes |
| AFP_NAKE0852   | <i>Sus scrofa</i> | Kenia         | native pig | AFP  | Yes | No  |
| AFP_NAKE0854   | <i>Sus scrofa</i> | Kenia         | native pig | AFP  | Yes | No  |
| AFP_NAKE0855   | <i>Sus scrofa</i> | Kenia         | native pig | AFP  | Yes | No  |
| AFP_NAKE0860   | <i>Sus scrofa</i> | Kenia         | native pig | AFP  | Yes | No  |
| AFP_NAKE0861   | <i>Sus scrofa</i> | Kenia         | native pig | AFP  | Yes | No  |
| AFP_NAKE0866   | <i>Sus scrofa</i> | Kenia         | native pig | AFP  | Yes | No  |
| AFP_NAKE0871   | <i>Sus scrofa</i> | Kenia         | native pig | AFP  | Yes | No  |
| AFP_NAKE0875   | <i>Sus scrofa</i> | Kenia         | native pig | AFP  | Yes | No  |
| AFP_NAKE0887   | <i>Sus scrofa</i> | Kenia         | native pig | AFP  | Yes | No  |
| AFP_NAKE0890   | <i>Sus scrofa</i> | Kenia         | native pig | AFP  | Yes | No  |
| AFP_NATZ0895   | <i>Sus scrofa</i> | Tanzania      | native pig | AFP  | Yes | No  |
| AFP_NATZ0897   | <i>Sus scrofa</i> | Tanzania      | native pig | AFP  | Yes | No  |
| AFP_NATZ0900   | <i>Sus scrofa</i> | Tanzania      | native pig | AFP  | Yes | No  |
| AFP_NATZ0903   | <i>Sus scrofa</i> | Tanzania      | native pig | AFP  | Yes | No  |
| AFP_NATZ0906   | <i>Sus scrofa</i> | Tanzania      | native pig | AFP  | Yes | No  |
| AFP-NABF0912   | <i>Sus scrofa</i> | Burkina Faso  | native pig | AFP  | Yes | No  |
| AFP-NABF0926   | <i>Sus scrofa</i> | Burkina Faso  | native pig | AFP  | Yes | No  |
| AFP-MUZW0725   | <i>Sus scrofa</i> | Zimbabwe      | Mukota     | AFP  | No  | Yes |
| AFP-MUZW0725   | <i>Sus scrofa</i> | Zimbabwe      | Mukota     | AFP  | No  | Yes |
| NEWB_WBIR0189  | <i>Sus scrofa</i> | Iran          | Wild boar  | NEWB | No  | Yes |
| NEWB_WBTQ0122  | <i>Sus scrofa</i> | Turkey        | Wild boar  | NEWB | No  | Yes |
| NEWB_WBTQ0119  | <i>Sus scrofa</i> | Turkey        | Wild boar  | NEWB | No  | Yes |
| NEWB_WBAM0001  | <i>Sus scrofa</i> | Armenia       | Wild boar  | NEWB | No  | Yes |
| NEWB_WBAM0002  | <i>Sus scrofa</i> | Armenia       | Wild boar  | NEWB | No  | Yes |
| NEWB_AM1281    | <i>Sus scrofa</i> | Armenia       | Wild boar  | NEWB | Yes | No  |
| NEWB_WBIR1270  | <i>Sus scrofa</i> | Iran          | Wild boar  | NEWB | Yes | No  |
| SCAP_BOBO0644  | <i>Sus scrofa</i> | Bolivia       | Criollo    | SCAP | Yes | No  |
| SCAP_BOBO0647  | <i>Sus scrofa</i> | Bolivia       | Criollo    | SCAP | Yes | No  |
| SCAP_BOBO0657  | <i>Sus scrofa</i> | Bolivia       | Criollo    | SCAP | Yes | No  |
| SCAP_CRRCR0566 | <i>Sus scrofa</i> | Costa Rica    | Criollo    | SCAP | Yes | No  |
| SCAP_CRRCR0570 | <i>Sus scrofa</i> | Costa Rica    | Criollo    | SCAP | Yes | No  |
| SCAP_CRRCR0572 | <i>Sus scrofa</i> | Costa Rica    | Criollo    | SCAP | Yes | No  |
| SCAP_CRRCR0579 | <i>Sus scrofa</i> | Costa Rica    | Criollo    | SCAP | Yes | No  |
| SCAP_CRRCR0583 | <i>Sus scrofa</i> | Costa Rica    | Criollo    | SCAP | Yes | No  |
| SCAP_CRRCR0593 | <i>Sus scrofa</i> | Costa Rica    | Criollo    | SCAP | Yes | No  |
| SCAP_CRRCR0599 | <i>Sus scrofa</i> | Costa Rica    | Criollo    | SCAP | Yes | No  |

|               |                           |                       |            |      |     |     |
|---------------|---------------------------|-----------------------|------------|------|-----|-----|
| SCAP_CRCU1115 | <i>Sus scrofa</i>         | Cuba                  | Criollo    | SCAP | Yes | No  |
| SCAP_CRCU1126 | <i>Sus scrofa</i>         | Cuba                  | Criollo    | SCAP | Yes | No  |
| SCAP_CRCU1149 | <i>Sus scrofa</i>         | Cuba                  | Criollo    | SCAP | Yes | No  |
| SCAP_CRCU1150 | <i>Sus scrofa</i>         | Cuba                  | Criollo    | SCAP | Yes | No  |
| SCAP_CRCU1163 | <i>Sus scrofa</i>         | Cuba                  | Criollo    | SCAP | Yes | No  |
| SCAP_CRCU1169 | <i>Sus scrofa</i>         | Cuba                  | Criollo    | SCAP | Yes | No  |
| SCAP_HLMX0146 | <i>Sus scrofa</i>         | Mexico                | Hairless   | SCAP | No  | Yes |
| SCAP_HLMX0950 | <i>Sus scrofa</i>         | Mexico                | Hairless   | SCAP | No  | Yes |
| SCAP_HLMX0956 | <i>Sus scrofa</i>         | Mexico                | Hairless   | SCAP | Yes | No  |
| AP_MICN0529   | <i>Sus scrofa</i>         | China                 | Minzhu     | ALP  | Yes | No  |
| AP_MICN0677   | <i>Sus scrofa</i>         | China                 | Minzhu     | ALP  | Yes | No  |
| AP_MICN0679   | <i>Sus scrofa</i>         | China                 | Minzhu     | ALP  | Yes | No  |
| AP_MICN0680   | <i>Sus scrofa</i>         | China                 | Minzhu     | ALP  | Yes | No  |
| AP_MICN0681   | <i>Sus scrofa</i>         | China                 | Minzhu     | ALP  | No  | Yes |
| AP_MICN0682   | <i>Sus scrofa</i>         | China                 | Minzhu     | ALP  | Yes | No  |
| AP_NPKR0794   | <i>Sus scrofa</i>         | Korea                 | native pig | ALP  | Yes | No  |
| AP_NPKR0796   | <i>Sus scrofa</i>         | Korea                 | native pig | ALP  | Yes | No  |
| AP_NPKR0798   | <i>Sus scrofa</i>         | Korea                 | native pig | ALP  | Yes | No  |
| AP_VTES0104   | <i>Sus scrofa</i>         | Vietnam (Marid zoo)   | vietnamite | ALP  | Yes | No  |
| AP_VTES0307   | <i>Sus scrofa</i>         | Vietnam (Catalonia)   | vietnamite | ALP  | Yes | Yes |
| AP_NAID1272   | <i>Sus scrofa</i>         | Indonesia             | native pig | ALP  | Yes | No  |
| AP_NAID1276   | <i>Sus scrofa</i>         | Indonesia             | native pig | ALP  | Yes | No  |
| AP_FGCN0527   | <i>Sus scrofa</i>         | China                 | Fengjing   | ALP  | Yes | No  |
| AP_JHCN0686   | <i>Sus scrofa</i>         | China                 | Jinhua     | ALP  | Yes | No  |
| AP_JHCN0688   | <i>Sus scrofa</i>         | China                 | Jinhua     | ALP  | Yes | No  |
| AP_MSCN0405   | <i>Sus scrofa</i>         | China                 | Meishan    | ALP  | Yes | Yes |
| AP_MSES0283   | <i>Sus scrofa</i>         | China                 | Meishan    | ALP  | No  | Yes |
| AP_MSUS0620   | <i>Sus scrofa</i>         | United States (China) | Meishan    | ALP  | Yes | Yes |
| AP_MSUS0621   | <i>Sus scrofa</i>         | United States (China) | Meishan    | ALP  | No  | Yes |
| AP_NANP1274   | <i>Sus scrofa</i>         | Nepal                 | native pig | ALP  | Yes | No  |
| AWB_WBJP0491  | <i>Sus scrofa</i>         | Japan                 | Wild boar  | AWB  | Yes | Yes |
| AWB_WBJP1001  | <i>Sus scrofa</i>         | Japan                 | Wild boar  | AWB  | Yes | No  |
| AWB_WBJP1007  | <i>Sus scrofa</i>         | Japan                 | Wild boar  | AWB  | Yes | No  |
| AWB_WBCN0695  | <i>Sus scrofa</i>         | China                 | Wild boar  | AWB  | Yes | Yes |
| AWB_WBCN0696  | <i>Sus scrofa</i>         | China                 | Wild boar  | AWB  | Yes | No  |
| AWB_WBCN0698  | <i>Sus scrofa</i>         | China                 | Wild boar  | AWB  | Yes | No  |
| AWB_WBCN0699  | <i>Sus scrofa</i>         | China                 | Wild boar  | AWB  | Yes | No  |
| AWB_WBRU1089  | <i>Sus scrofa</i>         | Russia                | Wild boar  | AWB  | Yes | No  |
| AWB_WBKR0446  | <i>Sus scrofa</i>         | Korea                 | Wild boar  | AWB  | No  | Yes |
| AWB_WBKR0829  | <i>Sus scrofa</i>         | Korea                 | Wild boar  | AWB  | Yes | No  |
| AWB_WBRU1098  | <i>Sus scrofa</i>         | Russia                | Wild boar  | AWB  | Yes | No  |
| AWB_WBRU1102  | <i>Sus scrofa</i>         | Russia                | Wild boar  | AWB  | Yes | No  |
| AWB_WBJP1003  | <i>Sus scrofa</i>         | Japan                 | Wild boar  | AWB  | Yes | No  |
| AWB_WBJP1010  | <i>Sus scrofa</i>         | Japan                 | Wild boar  | AWB  | Yes | No  |
| AWB_WBJP1011  | <i>Sus scrofa</i>         | Japan                 | Wild boar  | AWB  | Yes | No  |
| AWB_WBKR0827  | <i>Sus scrofa</i>         | Korea                 | Wild boar  | AWB  | Yes | No  |
| AWB_WBKR0828  | <i>Sus scrofa</i>         | Korea                 | Wild boar  | AWB  | Yes | No  |
| AWB_WBKR0831  | <i>Sus scrofa</i>         | Korea                 | Wild boar  | AWB  | Yes | No  |
| AWB_WBRU1064  | <i>Sus scrofa</i>         | Russia                | Wild boar  | AWB  | Yes | No  |
| AWB_WBRU1070  | <i>Sus scrofa</i>         | Russia                | Wild boar  | AWB  | Yes | No  |
| AWB_WBRU1079  | <i>Sus scrofa</i>         | Russia                | Wild boar  | AWB  | Yes | No  |
| AWB_WBRU1097  | <i>Sus scrofa</i>         | Russia                | Wild boar  | AWB  | Yes | No  |
| AWB_WBRU1100  | <i>Sus scrofa</i>         | Russia                | Wild boar  | AWB  | Yes | No  |
| OUTG_SLID1275 | <i>Sus celebensis</i>     | Indonesia             | Wild       | -    | Yes | No  |
| OUTG_SCPH1280 | <i>Sus cebifrons</i>      | Philippines           | Wild       | -    | Yes | No  |
| OUTG_BBES0280 | <i>Babyrusa babyrussa</i> | Madrid Zoo            | Wild       | -    | No  | Yes |
| OUTG_BAGB0335 | <i>Sus barbatus</i>       | London Zoo            | Wild       | -    | No  | Yes |

**Supplementary table S3.** Primers used for the amplification of the Y-chromosome 7 loci

| LOCUS   | PCR                  | PRIMERS                                             | SEQUENCE                                              | Tm <sup>1</sup> (°C) | Reference           |
|---------|----------------------|-----------------------------------------------------|-------------------------------------------------------|----------------------|---------------------|
| UTY     | 1                    | UTY <sub>exo1</sub> F                               | AGCTGTTTTTCGGTGATGAGG                                 | 65                   | Ramírez et al. 2009 |
|         |                      | UTY <sub>exo2</sub> R                               | TGCCCAACAGAGTTTTAGTCC                                 |                      |                     |
|         | 2                    | UTY <sub>in7</sub> F                                | CATTTTCAGTTAGCTTTGATTGACTC                            | 65                   | Ramírez et al. 2009 |
|         |                      | UTY <sub>in7R4</sub>                                | TCCTGAAGGACAATCATATAATCAA                             |                      |                     |
| 3       | UTY <sub>in7F5</sub> | GTACATTCAGAGCATTGTGTTT                              |                                                       |                      |                     |
|         | UTY <sub>in7R5</sub> | CAACTGGGCAATATGAAACTGA                              |                                                       |                      |                     |
| 4       | UTY <sub>in9F3</sub> | GGCCTTACCCAAGGCATGTAG                               | 65                                                    | Ramírez et al. 2009  |                     |
|         | UTY <sub>in9R2</sub> | CCCTCCAAAGCTGTGTGTATATCTC                           |                                                       |                      |                     |
| USP9Y   | 5                    | USP9Y <sub>in24</sub> F<br>USP9Y <sub>exo25</sub> R | GGACTGGTTCCTAATCAGGGTAATTTA<br>TAGCACCCTGCTTGATCATGAG | 65                   | Ramírez et al. 2009 |
| DBY     | 6                    | DBY <sub>in1F2</sub><br>DBY <sub>in1R2</sub>        | CTAAACAGAGTGTGCTGTTTGACA<br>TCATAATCATTCCTGCCACGA     | 60                   |                     |
| DDX3Y   | 7                    | DBY <sub>in5F</sub><br>DBY <sub>in5R</sub>          | CTGTCCTCGACATATTGAAAGTG<br>CCATCTCAACATCGCTGAAC       | 67                   |                     |
| EIF2s3Y | 8                    | EIF2s3YF<br>EIF2s3YR                                | TCCTACTTAGACGGCTTCTTGG<br>AGCCCACAGCAGGAGAACT         | 65                   | Ramírez et al. 2009 |
| SRY     | 9                    | SRY1F                                               | TCTATAACATCCGCCGCCTG                                  | 60                   |                     |
|         |                      | SRY1R                                               | ATCCTCTCCTCTACGCGCAC                                  |                      |                     |
|         | 10                   | SRY2F                                               | GGCTCCTCACTATTTCCGACG                                 |                      |                     |
|         |                      | SRY2R                                               | ATTCTGCATGCTCCCCAG                                    |                      |                     |
|         |                      | SRY3F                                               | AGCTTGGGAAATCTGTTCA                                   |                      |                     |
| 11      | SRY3R                | ACCCAATTCCTTTCCTTTCG                                |                                                       |                      |                     |
| AMELY   | 12                   | AmelY <sub>proFW</sub><br>AmelY <sub>E1Rv</sub>     | GCGTTACATGCATATTGCCTTG<br>TCAAGGATGCTGGAGCTTTT        | 55                   | Ramírez et al. 2009 |
|         |                      | I2FW2                                               | TGTCCTCCAAATTACAGTGCTC                                |                      |                     |
|         | 13                   | I2RV3                                               | CATGATGGGTGTAGTAAAGTGGA                               |                      |                     |

**Supplementary table S4.** Functional annotations for the sequenced regions

| <b>Locus</b>   | <b>Feature</b> | <b>Start</b> | <b>End</b> |
|----------------|----------------|--------------|------------|
| <b>SRY-1</b>   | PROMOTER       | 1            | 3879       |
| <b>SRY-2</b>   | P5UTR          | 1            | 236        |
| <b>SRY-2</b>   | CDS            | 237          | 434        |
| <b>SRY-3</b>   | CDS            | 1            | 395        |
| <b>SRY-3</b>   | 3UTR           | 396          | 635        |
| <b>AMELY-1</b> | noncoding      | 1            | 535        |
| <b>AMELY-1</b> | 5UTR           | 536          | 543        |
| <b>AMELY-2</b> | intron         | 1            | 710        |
| <b>USP9Y</b>   | intron         | 1            | 404        |
| <b>USP9Y</b>   | CDS            | 405          | 427        |
| <b>DBY</b>     | intron         | 1            | 679        |
| <b>DBY</b>     | CDS            | 680          | 695        |
| <b>DDX3Y</b>   | unknown        | 1            | 16         |
| <b>DDX3Y</b>   | intron         | 17           | 618        |
| <b>DDX3Y</b>   | unknown        | 619          | 626        |
| <b>UTY-1</b>   | CDS            | 1            | 97         |
| <b>UTY-1</b>   | intron         | 98           | 289        |
| <b>UTY-1</b>   | CDS            | 290          | 325        |
| <b>UTY-1</b>   | CDS            | 326          | 330        |
| <b>UTY-2</b>   | CDS            | 1            | 42         |
| <b>UTY-2</b>   | intron         | 43           | 596        |
| <b>UTY-3</b>   | intron         | 1            | 491        |
| <b>UTY-4</b>   | intron         | 1            | 353        |
| <b>eifs3y</b>  | unknown        | 1            | 7          |
| <b>eifs3y</b>  | CDS            | 8            | 49         |
| <b>eifs3y</b>  | unknown        | 50           | 184        |



**Supplementary table S5.** Genotyped regions for the seven loci of Chromosome-Y

| Position | Ancestral Allele | Alleles   | 5' seq                             |
|----------|------------------|-----------|------------------------------------|
| 367      | gtag             | gtag/---- | CTTTTCATTTATTTG                    |
| 527      | g                | g/a       | CATGTGAGTGCACCTTAG                 |
| 1119     | g                | g/t       | GTAGGACTTACTCCCACCTTTGCTT          |
| 1493     | c                | c/t       | TGGGGGTTCAATT                      |
| 2754     | t                | t/c       | TACAGTCATTACTCCCATT                |
| 4250     | c                | c/g       | CACTATTTCCGACGGACAATCATAGCTCAAA    |
| 4675     | g                | g/c       | GCTCACTTCTGCAACAGGAGGATC           |
| 4861     | g                | g/a       | CTGTTATTTACCTGTGACTTA              |
| 5186     | g                | g/a       | AAAATGGTAACTCCCTCAAATAC            |
| 5220     | t                | t/c       | CATAACATGTTCTTAAAAGTAAACTTGAA      |
| 5858     | NA               | t/c       | CCCCAAGAGGTCTGCA                   |
| 6041     | NA               | g/a       | GCTCACTGTCTGA                      |
| 6744     | g                | g/a       | GTCACAGTCATTGCACAAGCATAAAA         |
| 6789     | g                | g/a       | CTTAGTATCTGGCTAGTCCAGTATTGTTTT     |
| 7227     | a                | a/c       | CTTGTGACAAGAAATTTTCATT             |
| 7575     | g                | g/a       | CCTGCATCCTCATGGATACTAGTCTGATTY     |
| 7772     | t                | t/c       | TGTTAGATTAGACTCAGAAGTCCAT          |
| 7892     | g                | g/a       | AAAACATTTTAGGAGAAAATGGATTTCTCGTTAT |
| 8059     | g                | g/c       | TTAGCGGAATGGACAGGTACGGACCGCT       |
| 8152     | c                | c/t       | TCGTCCAAGTGGT                      |
| 8205     | c                | c/g       | CCGTCAAGTGGCTTTACTTA               |
| 8397     | t                | t/c       | TTTCAAATAATGAC                     |
| 8399     | t                | t/g       | TTTCAAATAATGACYA                   |

**Supplementary table S6.** Prior parameter ranges of the demographic models.

| <b>Prior parameters</b> | <b>Range of values</b> | <b>Distribution</b> |
|-------------------------|------------------------|---------------------|
| $\theta_W$ Asia         | 5E-04 – 1E-02          | log uniform         |
| $f_{noA}$               | 5E-02 – 1E01           | log uniform         |
| $M$                     | 1E02 – 1E04            | log uniform         |
| $T_s$                   | 5E-01 – 1E01           | log uniform         |
| $f_{ANC}$               | 5E-02 – 1E01           | log uniform         |
| $T_0$                   | 1E01 – 5E02            | log uniform         |
| $T_M$                   | 1E-03                  | Fixed               |

$\theta_W$  Asia, Asian current population mutation parameter.  $f_{noA}$ , a fraction of the non-Asian current population size.  $M$ , unidirectional population migration from the non-Asian to the Asian population.  $T_s$ , time of split between the Asian and the non-Asian population.  $f_{ANC}$ , fraction of the ancestral population size.  $T_0$ , time of split between the ancestral population of these populations and the outgroup.  $T_M$ , time of the onset of migration. Times and population migration parameter are given in  $N$  units.



ANGLP\_PLUS0638 . . . . . C G . . . . . G . .  
 ANGLP\_PLUS0639 . . . . . C G . . . . . G . .  
 ANGLP\_SGB0363 . . . . . C G . . . . .  
 ANGLP\_SGB0364 . . . . . C G . . . . .  
 ANGLP\_WGB0746 . . . . . C G . . . . . G . .  
 ANGLP\_SGB0756 . . . . . C G . . . . .  
 ANGLP\_TWGB0371 . . G T T . C A G T C A G A A A T A C C G . . G C A A G T G T A C  
 ANGLP\_TWGB0372 . . G T T . C A G T C A G A A A T A C C G . . G C A A G T G T . A C  
 ANGLP\_TWGB0748 . . G T T . C A G T C A G A A A T A C C G . . G C A A G T G T . A C

INTP

INTP\_DUDK0474 . . . . . C G . . . . .  
 INTP\_DUES0169 . . . . . C G . . . . .  
 INTP\_DUES0194 . . . . . C G . . . . .  
 INTP\_DUES0277 . . . . . C G . . . . .  
 INTP\_DUES0460 . . . . . C G . . . . .  
 INTP\_DUES0538 . . . . . C G . . . . .  
 INTP\_DUGB0353 . . . . . C G . . . . .  
 INTP\_DUGB0355 . . . . . C G . . . . .  
 INTP\_DUGB0356 . . . . . C G . . . . .  
 INTP\_DUGB0357 . . . . . C G . . . . .  
 INTP\_DUHU0199 . . . . . C G . . . . .  
 INTP\_DUHU0202 . . . . . C G . . . . .  
 INTP\_DUNO0087 . . . . . C G . . . . .  
 INTP\_DUNO0088 . . . . . C G . . . . .  
 INTP\_DUUS0458 . . . . . C G . . . . .  
 INTP\_DUUS0602 . . . . . C G . . . . .  
 INTP\_DUUS0603 . . . . . C G . . . . .  
 INTP\_DUUS0604 . . . . . C G . . . . .  
 INTP\_DUUS0605 . . . . . C G . . . . .  
 INTP\_DUUS0613 . . . . . C G . . . . .  
 INTP\_HSGB0977 . . . . . C G . . . . .  
 INTP\_HSUS0614 . . . . . C G . . . . .  
 INTP\_HSUS0615 . . . . . C G . . . . .  
 INTP\_HSUS0616 . . . . . C G . . . . .  
 INTP\_HSUS0618 . . . . . C G . . . . .  
 INTP\_LRES0285 . . . . . C G . . . . .  
 INTP\_LRES0465 . . . . . C G . . . . .  
 INTP\_LRGB0336 . . . . . C G . . . . .  
 INTP\_LRGB0338 . . . . . C G . . . . .  
 INTP\_LRGB0339 . . . . . C G . . . . .  
 INTP\_LRGB0341 . . . . . C G . . . . .  
 INTP\_LRGB0342 . . . . . C G . . . . .  
 INTP\_LRGB0967 . . . . . C G . . . . .  
 INTP\_LRUS0633 . . . . . C G . . . . .  
 INTP\_LRUS0635 . . . . . C G . . . . .  
 INTP\_LRUS0637 . . . . . C G . . . . .  
 INTP\_LWDK0473 . . . . . C G . . . . .  
 INTP\_LWES0284 . . . . . C G . . . . .  
 INTP\_LWFI0343 . . . . . C G . . . . .  
 INTP\_LWFR0351 . . . . . C G . . . . .  
 INTP\_LWFR0352 . . . . . C G . . . . .  
 INTP\_LWGB0344 . . . . . C G . . . . .  
 INTP\_LWGB0345 . . . . . C G . . . . .  
 INTP\_LWGB0348 . . . . . C G . . . . .  
 INTP\_LWGB0349 . . . . . C G . . . . .  
 INTP\_LWGB0350 . . . . . C G . . . . .  
 INTP\_LWGB0987 . . . . . C G . . . . .  
 INTP\_PIDE0463 . . . . . C G . . . . .  
 INTP\_PIDE0478 . . . . . C G . . . . .  
 INTP\_PIES0464 . . . . . C G . . . . .  
 INTP\_PIES0470 . . . . . C G . . . . .  
 INTP\_PIFR0479 . . . . . C G . . . . .  
 INTP\_PIGB0747 . . . . . C G . . . . .  
 INTP\_SYES0472 . . . . . C G . . . . .  
 INTP\_YKUS0627 . . . . . C G . . . . .  
 INTP\_YKUS0628 . . . . . C G . . . . .  
 INTP\_YKUS0631 . . . . . C G . . . . .  
 INT\_MPES0758 . . . . . C G . . . . .  
 INT\_MPES0759 . . . . . C G . . . . .  
 INT\_MPES0760 . . . . . C G . . . . .  
 INT\_MPDK0728 . . . . . C G . . . . .  
 INT\_MPDK1034 . . . . . C G . . . . .  
 . . G T T . . . . G T C A G A A A T A C C G . . G C A A G T G T G T . C

AFWB

AFWB\_WBTN0962 . . . . . G . . . . .  
 AFWB\_WBTN0963 . . . . . G . . . . .  
 AFWB\_WBTN0964 . . . . . G . . . . .  
 AFWB\_NEWB0517 . . . . . G . . . . .  
 AFWB\_NEWB1271 . . . . . G . . . . .

AFRICA

AFP\_NABF0913 . . . . . C G . . . . .  
 AFP\_NABF0922 . . . . . C G . . . . .  
 AFP\_NABF0923 . . . . . C G . . . . .  
 AFP\_NABF0927 . . . . . C G . . . . .  
 AFP\_NACI0911 . . . . . C G . . . . .  
 AFP\_NAKE0852 . . . . . C G . . . . .  
 AFP\_NAKE0854 . . . . . C G . . . . .  
 AFP\_NAKE0855 . . . . . C G . . . . .  
 AFP\_NAKE0860 . . . . . C G . . . . .  
 AFP\_NAKE0861 . . . . . C G . . . . .  
 AFP\_NAKE0866 . . . . . C G . . . . .



**Supplementary table S8.** Population differentiation between Asian and non-Asian groups

|                         | <b>Sequencing</b> |                     | <b>Genotyping</b> |                     |
|-------------------------|-------------------|---------------------|-------------------|---------------------|
|                         | <i>Fst</i>        | <i>P-value</i>      | <i>Fst</i>        | <i>P-value</i>      |
| <b>Asia vs Non-Asia</b> | 0.5036            | <1e <sup>-3</sup> * | 0.5843            | <1e <sup>-3</sup> * |

\* Significant for multiple test with Bonferroni correction ( $\epsilon=0.05$ )

**Supplementary table S9.** Population differentiation between each group and the rest **(A)** and between all pairwise comparisons **(B)** for genotype data

**A.**

| <b>Group</b> | <b>nsam</b> | <b><i>Fst</i></b> | <b><i>P</i>-value</b> |
|--------------|-------------|-------------------|-----------------------|
| <b>EWB</b>   | 39          | 0.274             | <1E-3                 |
| <b>MEDLP</b> | 20          | 0.138             | 0.004                 |
| <b>INTP</b>  | 62          | 0.160             | <1E-3                 |
| <b>ANGLP</b> | 29          | 0.027             | 0.134                 |
| <b>AFWB</b>  | 5           | 0.194             | 0.031                 |
| <b>AFP</b>   | 22          | 0.141             | <1E-3                 |
| <b>NEWB</b>  | 2           | 0.358             | 0.019                 |
| <b>SCAP</b>  | 17          | 0.197             | <1E-3                 |
| <b>ALP</b>   | 18          | 0.117             | 0.016                 |
| <b>AWB</b>   | 22          | 0.757             | <1E-3                 |

**B.**

| <b><i>Fst</i>/<i>P</i>-value</b> | <b>EWB</b> | <b>MEDLP</b> | <b>INTP</b> | <b>ANGLP</b> | <b>AFWB</b> | <b>AFP</b> | <b>NEWB</b> | <b>SCAP</b> | <b>ALP</b> | <b>AWB</b> |
|----------------------------------|------------|--------------|-------------|--------------|-------------|------------|-------------|-------------|------------|------------|
| EWB                              |            | 0.017        | <1E-3       | <1E-3        | 0.989       | <1E-3      | 0.108       | <1E-3       | <1E-3      | <1E-3      |
| MEDLP                            | 0.119      |              | <1E-3       | <1E-3        | 0.311       | <1E-3      | 0.130       | <1E-3       | <1E-3      | <1E-3      |
| INTP                             | 0.600      | 0.384        |             | 0.168        | <1E-3       | 0.634      | 0.002       | 0.312       | <1E-3      | <1E-3      |
| ANGLP                            | 0.348      | 0.193        | 0.027       |              | 0.001       | 0.165      | 0.006       | 0.067       | 0.032      | <1E-3      |
| AFWB                             | -0.123     | 0.024        | 0.539       | 0.309        |             | 0.001      | 0.436       | 0.001       | 0.060      | <1E-3      |
| AFP                              | 0.667      | 0.419        | -0.017      | 0.060        | 0.590       |            | 0.011       | 0.497       | 0.002      | <1E-3      |
| NEWB                             | 0.645      | 0.603        | 0.759       | 0.490        | 0.353       | 0.841      |             | 0.005       | 0.099      | 0.014      |
| SCAP                             | 0.792      | 0.582        | 0.005       | 0.101        | 0.719       | -0.022     | 0.926       |             | 0.002      | <1E-3      |
| ALP                              | 0.336      | 0.296        | 0.266       | 0.141        | 0.316       | 0.304      | 0.382       | 0.330       |            | <1E-3      |
| AWB                              | 0.830      | 0.820        | 0.813       | 0.714        | 0.818       | 0.837      | 0.838       | 0.851       | 0.378      |            |

**Supplementary table S10.** Marginal densities and Posterior distributions of the demographic models

| <b>Model</b>                        | <b>Marginal density</b> | <b><i>P</i>-value</b> | <b>Posterior probability</b> |
|-------------------------------------|-------------------------|-----------------------|------------------------------|
| <b>Model <i>I<sub>old</sub></i></b> | 4.08E-07                | 5E-03                 | 2.28E-12                     |
| <b>Model <i>IM</i></b>              | 1.78E-05                | 9.77E-01              | >9.99E-01                    |

Model *I<sub>old</sub>*, Isolation model. Model *IM*, isolation with unidirectional admixture.
